# Supplementary material for: Novel styryl-thiazole hybrids as potential anti-Alzheimer's agents
Source: Royal Society of Chemistry journal article supplement (doi:10.1039/d3md00308f), 2023-01-01
Supplement: d3md00308f1.pdf [file d3md00308f1.pdf]

# SUPPORTING INFORMATION

## Novel Styryl-thiazole hybrids as potential anti-Alzheimer's agents

Niki Gouleni,<sup>a</sup> Annalisa Di Rienzo,<sup>b</sup> Ahmet Yılmaz,<sup>c</sup> Harun Selvitopi,<sup>d</sup> Mehmet Enes Arslan,<sup>c</sup> Adil Mardinoglu<sup>e,f</sup> Hasan Turkez<sup>g</sup>, Antonio Di Stefano,<sup>b</sup> Stamatia Vassiliou,<sup>a,\*\*</sup> Ivana Cacciatore<sup>b,\*</sup>

<sup>a</sup>Laboratory of Organic Chemistry, Department of Chemistry, National and Kapodistrian University of Athens, Athens, Greece

<sup>b</sup>Department of Pharmacy, "G. D'Annunzio" University of Chieti-Pescara, 66100, Chieti Scalo, CH, Italy

<sup>c</sup>Department of Molecular Biology and Genetics, Faculty of Science, Erzurum Technical University, 25050, Erzurum, Turkey

<sup>d</sup>Department of Mathematics, Faculty of Sciences, Erzurum Technical University, 25050, Erzurum, Turkey

<sup>e</sup>Science for Life Laboratory, KTH-Royal Institute of Technology, SE-17121 Stockholm, Sweden

<sup>f</sup>Centre for Host-Microbiome Interactions, Faculty of Dentistry, Oral & Craniofacial Sciences, King's College London, London SE1 9RT, UK

<sup>g</sup>Department of Medical Biology, Faculty of Medicine, Atatürk University, Erzurum, Turkey

\*Corresponding Author. Department of Pharmacy, "G. d'Annunzio" University of Chieti-Pescara, Via dei Vestini 31, 66100, Chieti Scalo, CH, Italy.

\*\* Corresponding Author. Laboratory of Organic Chemistry, Department of Chemistry, National and Kapodistrian University of Athens, Athens, Greece.

E-mail addresses: ivana.cacciatore@unich. it (I. Cacciatore) and svassiliou@chem.uoa.gr (S. Vassiliou).

## EXPERIMENTAL PART

### General method for the synthesis of cinnamamides **2a-h**

A solution of cinnamic acids **1a-h** (1.00 mmol) and *N*-hydroxysuccinimide (0.13 g, 1.12 mmol) in dry CH<sub>2</sub>Cl<sub>2</sub> (2.5 mL) was cooled at 0°C. Then EDC·HCl (0.19, 1.00 mmol) was added and the reaction mixture was stirred at room temperature for 18 h. Then CH<sub>2</sub>Cl<sub>2</sub> was added and the organic phase was washed with H<sub>2</sub>O, NaHCO<sub>3</sub> and brine, dried over Na<sub>2</sub>SO<sub>4</sub>, and concentrated under reduced pressure. The crude ester was dissolved in a mixture of CHCl<sub>3</sub>/CH<sub>3</sub>CN 1:2 (6 mL), cooled at 0°C and 25% aq. NH<sub>3</sub> (~2 mL) was added dropwise under intense stirring. The biphasic system was stirred for 1h at room temperature, diluted with ethyl acetate and washed with H<sub>2</sub>O. The organic phase was dried over Na<sub>2</sub>SO<sub>4</sub> and concentrated in vacuo to give the cinnamamides **2a-h** in pure form.

### Cinnamamide, **2a**

Following the general method, using **1a** (1.26 g, 8.60 mmol) **2a** was obtained as white solid (1.10 g) in 87% yield.  $R_f = 0.28$  (CH<sub>2</sub>Cl<sub>2</sub>/MeOH 9.8:0.2). <sup>1</sup>H NMR (400 MHz, DMSO) δ 7.65-7.55 (m, 3H), 7.47 – 7.34 (m, 4H), 7.09 (bs, 1H), 6.61 (d,  $J = 15.9$  Hz, 1H). <sup>13</sup>C NMR (101 MHz, DMSO) δ 166.6, 139.1, 134.9, 129.4, 128.9, 127.5, 122.3. MS (ESI)  $m/z$  calculated for C<sub>9</sub>H<sub>10</sub>NO<sup>+</sup> [M+H]<sup>+</sup> 148.1, found 148.1.

### (*E*)-3-(*p*-tolyl)acrylamide, **2b**

Following the general method D, using **1b** (1.31 g, 8.10 mmol) **2b** was obtained as white solid (0.99 g) in 76% yield.  $R_f = 0.67$  (CH<sub>2</sub>Cl<sub>2</sub>/MeOH 9.8:0.2) <sup>1</sup>H NMR (200 MHz, DMSO) δ 7.60-7.43 (m, 3H), 7.33 (s, 1H), 7.30-7.21 (m, 2H), 7.06 (bs, 1H), 6.54 (d,  $J = 15.9$  Hz, 1H), 2.31 (s, 3H). <sup>13</sup>C NMR (50 MHz, DMSO) δ 166.8, 139.2, 139.1, 132.1, 129.5, 127.5, 121.3, 21.0. MS (ESI)  $m/z$  calculated for C<sub>10</sub>H<sub>12</sub>NO<sup>+</sup> [M+H]<sup>+</sup> 162.1, found 162.1.

### (*E*)-3-(4-methoxyphenyl)acrylamide, **2c**

Following the general method D, using **1c** (0.83 g, 4.60 mmol) **2c** was obtained as white solid (0.66 g) in 83% yield.  $R_f = 0.29$  (CH<sub>2</sub>Cl<sub>2</sub>/MeOH 9.8:0.2) <sup>1</sup>H NMR (200 MHz, DMSO) δ 7.60-7.47 (m, 3H), 7.34 (d,  $J = 15.8$  Hz, 1H), 7.04 (bs, 1H), 6.96 (d,  $J = 8.7$  Hz, 2H), 6.47 (d,  $J = 15.8$  Hz, 1H), 3.77 (s, 3H). <sup>13</sup>C NMR (50 MHz, DMSO) δ 167.0, 160.3, 138.9, 129.1, 127.4, 119.8, 114.4, 55.3. MS (ESI)  $m/z$  calculated for C<sub>10</sub>H<sub>12</sub>NO<sub>2</sub><sup>+</sup> [M+H]<sup>+</sup> 178.1, found 178.2.

### (*E*)-3-(3,4-dimethoxyphenyl)acrylamide, **2d**

Following the general method D, using **1d** (0.96 g, 4.60 mmol) **2d** was obtained as white solid (0.75 g) in 79% yield.  $R_f = 0.26$  (CH<sub>2</sub>Cl<sub>2</sub>/MeOH 9.8:0.2). <sup>1</sup>H NMR (200 MHz, DMSO) δ 7.45 (s, 1H), 7.37 (d,  $J = 15.8$  Hz, 1H), 7.19 – 6.92 (m, 4H), 6.51 (d,  $J = 15.8$  Hz, 1H), 3.79 (s, 3H), 3.78 (s, 3H). <sup>13</sup>C NMR (50 MHz, DMSO) δ 167.1, 150.1, 148.9, 139.3, 127.7, 121.5, 120.0, 111.7, 109.9, 55.6, 55.4. MS (ESI)  $m/z$  calculated for C<sub>11</sub>H<sub>14</sub>NO<sub>3</sub><sup>+</sup> [M+H]<sup>+</sup> 208.1, found 208.2.

#### **(E)-3-(3,4,5-trimethoxyphenyl)acrylamide, 2e**

Following the general method D, using **1e** (1.00 g, 4.20 mmol) **2e** was obtained as white solid (0.81 g) in 81% yield.  $R_f = 0.50$  (CH<sub>2</sub>Cl<sub>2</sub>/MeOH 9.8:0.2). <sup>1</sup>H NMR (200 MHz, DMSO) δ 7.45 (bs, 1H), 7.36 (d,  $J = 15.8$  Hz, 1H), 7.05 (bs, 1H), 6.88 (s, 2H), 6.56 (d,  $J = 15.8$  Hz, 1H), 3.81 (s, 6H), 3.68 (s, 3H). <sup>13</sup>C NMR (50 MHz, DMSO) δ 166.8, 153.1, 139.5, 138.6, 130.6, 121.7, 104.9, 60.1, 55.9. MS (ESI)  $m/z$  calculated for C<sub>12</sub>H<sub>16</sub>NO<sub>4</sub><sup>+</sup> [M+H]<sup>+</sup> 238.1, found 238.3.

#### **(E)-3-(4-chlorophenyl)acrylamide, 2f**

Following the general method D, using **1f** (0.59 g, 3.20 mmol) **2f** was obtained as white solid (0.47 g) in 81% yield.  $R_f = 0.65$  (CH<sub>2</sub>Cl<sub>2</sub>/MeOH 9.8:0.2). <sup>1</sup>H NMR (200 MHz, DMSO) δ 7.58 (d,  $J = 8.0$  Hz, 3H), 7.46 (d,  $J = 6.7$  Hz, 2H), 7.37 (s, 1H), 7.16 (bs, 1H), 6.62 (d,  $J = 16.0$  Hz, 1H). <sup>13</sup>C NMR (50 MHz, DMSO) δ 166.5, 137.8, 133.9, 129.3, 129.0, 123.2. MS (ESI)  $m/z$  calculated for C<sub>9</sub>H<sub>7</sub>ClNO<sup>-</sup> [M-H]<sup>-</sup> 180.0, found 180.0.

#### **(E)-3-(4-fluorophenyl)acrylamide, 2g**

Following the general method D, using **1g** (1.50 g, 9.00 mmol) **2g** was obtained as white solid (1.16 g) in 78% yield.  $R_f = 0.25$  (CH<sub>2</sub>Cl<sub>2</sub>/MeOH 9.8:0.2). <sup>1</sup>H NMR (200 MHz, DMSO) δ 7.69 – 7.57 (m, 2H), 7.57 (bs, 1H), 7.42 (d,  $J = 15.8$  Hz, 1H), 7.24 (t,  $J = 8.9$  Hz, 2H), 7.16 (bs, 1H), 6.56 (d,  $J = 15.9$  Hz, 1H). <sup>13</sup>C NMR (50 MHz, DMSO) δ 166.7, 162.8 (d,  $J = 239.4$  Hz), 138.0, 131.5 (d,  $J = 3.2$  Hz), 129.7 (d,  $J = 8.6$  Hz), 122.3, 115.9 (d,  $J = 21.8$  Hz). MS (ESI)  $m/z$  calculated for C<sub>9</sub>H<sub>7</sub>FNO<sup>-</sup> [M-H]<sup>-</sup> 164.1, found 164.2.

#### **(E)-3-(4-nitrophenyl)acrylamide, 2h**

Following the general method D, using **1h** (1.00 g, 5.20 mmol) **2h** was obtained as white solid (0.82 g) in 82% yield.  $R_f = 0.48$  (CH<sub>2</sub>Cl<sub>2</sub>/MeOH 9.8:0.2). <sup>1</sup>H NMR (200 MHz, DMSO) δ 8.25 (d,  $J = 8.7$  Hz, 2H), 7.82 (d,  $J = 8.6$  Hz, 2H), 7.68 (bs, 1H), 7.52 (d,  $J = 15.9$  Hz, 1H), 7.31 (bs, 1H), 6.80 (d,  $J = 15.9$  Hz, 1H). <sup>13</sup>C NMR (50 MHz, DMSO) δ 166.0, 147.5, 141.5, 136.9, 128.6, 126.7, 124.1. MS (ESI)  $m/z$  calculated for C<sub>9</sub>H<sub>7</sub>N<sub>2</sub>O<sub>3</sub><sup>-</sup> [M-H]<sup>-</sup> 191.1, found 191.3.

### General method for the synthesis of thioamides **3a-h**

In a flask containing cinnamamide **2a-h** (1.00 mmol), phosphorus pentasulfide P<sub>2</sub>S<sub>5</sub> (0.10 g, 0.22 mmol) and dry dioxane (13 mL) were added and the mixture was heated to 80°C for 2h, the reaction progress being monitored by TLC. Then, the reaction mixture was concentrated under reduced pressure and the crude material was purified by column chromatography using ethyl acetate and petroleum ether mixtures as eluent to give the desired product **3a-h**.

#### **((E)-3-phenylprop-2-enethioamide, 3a**

Following the general method E, using **2a** (0.10 g, 0.68 mmol) **3a** was obtained as yellow solid (0.06 g) in 50% yield. R<sub>f</sub> = 0.68 (AcOEt/PE (40-60°C) 1:1). <sup>1</sup>H NMR (200 MHz, CD<sub>3</sub>OD) δ 7.79 (d, *J* = 15.5 Hz, 1H), 7.57 (dd, *J* = 6.6, 2.9 Hz, 2H), 7.45 – 7.26 (m, 5H), 7.03 (d, *J* = 15.5 Hz, 1H). <sup>13</sup>C NMR (50 MHz, CD<sub>3</sub>OD) δ 199.5, 144.2, 136.2, 131.0, 130.0, 129.1, 127.4.

MS (ESI) *m/z* calculated for C<sub>9</sub>H<sub>8</sub>NS<sup>-</sup> [M-H]<sup>-</sup> 162.0, found 162.2.

#### **(E)-3-(p-tolyl)prop-2-enethioamide, 3b**

Following the general method E, using **2b** (0.28 g, 1.80 mmol) **3b** was obtained as yellow solid (0.19 g) in 49% yield. R<sub>f</sub> = 0.67 (AcOEt/PE (40-60°C) 1:1). <sup>1</sup>H NMR (200 MHz, DMSO) δ 9.47 (bs, 1H), 9.28 (bs, 1H), 7.30 – 7.10 (m, 6H), 2.27 (s, 3H). <sup>13</sup>C NMR (50 MHz, DMSO) δ 204.2, 139.8, 136.4, 129.7, 129.0, 127.9, 127.1, 20.7. MS (ESI) *m/z* calculated for C<sub>10</sub>H<sub>12</sub>NS<sup>+</sup> [M+MeOH+H]<sup>+</sup> 210.1, found 210.1.

#### **(E)-3-(4-methoxyphenyl)prop-2-enethioamide, 3c**

Following the general method E, using **2c** (0.03 g, 0.14 mmol) **3c** was obtained as yellow solid (0.01 g) in 37% yield. R<sub>f</sub> = 0.48 (AcOEt/PE (40-60°C) 1:1). <sup>1</sup>H NMR (400 MHz, DMSO) δ 9.39 (bs, 1H), 9.13 (bs, 1H), 7.62 (d, *J* = 15.4 Hz, 1H), 7.54 (d, *J* = 8.5 Hz, 2H), 6.99 (d, *J* = 8.6 Hz, 2H), 6.89 (d, *J* = 15.5 Hz, 1H), 3.80 (s, 3H). <sup>13</sup>C NMR (101 MHz, DMSO) δ 196.5, 160.6, 141.3, 129.5, 127.3, 125.1, 114.5, 55.3. MS (ESI) *m/z* calculated for C<sub>10</sub>H<sub>10</sub>NOS<sup>-</sup> [M-H]<sup>-</sup> 192.1, found 192.0.

#### **(E)-3-(3,4-dimethoxyphenyl)prop-2-enethioamide, 3d**

Following the general method E, using **2d** (0.70 g, 3.40 mmol) **3d** was obtained as yellow solid (0.08 g) in 27% yield. R<sub>f</sub> = 0.32 (AcOEt/PE (40-60°C) 1:1). <sup>1</sup>H NMR (400 MHz, DMSO) δ 9.39 (bs, 1H), 9.11 (bs, 1H), 7.60 (d, *J* = 15.4 Hz, 1H), 7.18 (s, 1H), 7.15 (d, *J* = 8.3 Hz, 1H), 7.00 (d, *J* = 8.3 Hz, 1H), 6.91 (d, *J* = 15.4 Hz, 1H), 3.80 (s, 3H), 3.79 (s, 3H). <sup>13</sup>C NMR (101 MHz, DMSO) δ 196.6,

150.5, 149.0, 141.7, 127.5, 125.3, 122.0, 111.8, 110.2, 55.6, 55.5. MS (ESI) m/z calculated for C<sub>11</sub>H<sub>12</sub>NO<sub>2</sub>S<sup>-</sup> [M-H]<sup>-</sup> 222.1, found 222.3.

**(E)-3-(3,4,5-trimethoxyphenyl)prop-2-enethioamide, 3e**

Following the general method E, using **2e** (0.47 g, 1.98 mmol) **3e** was obtained as yellow solid (0.30 g) in 60% yield. R<sub>f</sub> = 0.72 (AcOEt/PE (40-60°C) 7:3). <sup>1</sup>H NMR (200 MHz, CD<sub>3</sub>OD) δ 7.76 (s, 1H), 7.68 (s, 1H), 7.00 (s, 1H), 6.93 (s, 1H), 6.90 (s, 2H), 3.87 (s, 6H), 3.79 (s, 3H). <sup>13</sup>C NMR (50 MHz, MeOD) δ 199.7, 154.8, 144.2, 141.0, 132.3, 127.2, 106.6, 61.2, 56.7. MS (ESI) m/z calculated for C<sub>12</sub>H<sub>14</sub>NO<sub>3</sub>S<sup>-</sup> [M-H]<sup>-</sup> 252.1, found 251.9.

**(E)-3-(4-chlorophenyl)prop-2-enethioamide, 3f**

Following the general method E, using **2f** (0.35 g, 1.90 mmol) **3e** was obtained as yellow solid (0.12 g) in 32% yield.  $R_f = 0.58$  (AcOEt/PE (40-60°C) 1:1).  $^1\text{H}$  NMR (400 MHz, DMSO)  $\delta$  9.58 (s, 1H), 9.27 (s, 1H), 7.63 (s, 1H), 7.60 (d,  $J = 7.4$  Hz, 2H), 7.48 (d,  $J = 8.5$  Hz, 2H), 7.00 (d,  $J = 15.6$  Hz, 1H).  $^{13}\text{C}$  NMR (101 MHz, DMSO)  $\delta$  196.2, 139.6, 134.2, 133.8, 129.5, 129.1, 128.2. MS (ESI)  $m/z$  calculated for  $\text{C}_9\text{H}_7\text{ClNS}$ - [M-H]- 196.0, found 196.1.

**(E)-3-(4-fluorophenyl)prop-2-enethioamide, 3g**

Following the general method E, using **2g** (0.40 g, 2.40 mmol) **3g** was obtained as yellow solid (0.21 g) in 50% yield.  $R_f = 0.58$  (AcOEt/PE (40-60°C) 1:1).  $R_f = 0.78$  (AcOEt/PE (40-60°C) 1:1).  $^1\text{H NMR}$  (400 MHz, DMSO)  $\delta$  9.54 (s, 1H), 9.24 (s, 1H), 7.69 – 7.60 (m, 3H), 7.26-7.23 (m, 2H), 6.95 (d,  $J = 15.5$  Hz, 1H).  $^{13}\text{C NMR}$  (101 MHz, DMSO)  $\delta$  196.3, 162.9 (d,  $J = 247.9$  Hz), 140.0, 131.4 (d,  $J = 3.1$  Hz), 130.1 (d,  $J = 8.6$  Hz), 127.4 (d,  $J = 2.1$  Hz), 116.1 (d,  $J = 21.8$  Hz). MS (ESI)  $m/z$  calculated for  $\text{C}_9\text{H}_9\text{FNS}^+$   $[\text{M}+\text{H}]^+$  182.0, found 182.2.

### **(E)-3-(4-nitrophenyl)prop-2-enethioamide, 3h**

Following the general method E, using **2h** (0.36 g, 1.85 mmol) **3h** was obtained as yellow solid (0.06 g) in 17% yield.  $R_f = 0.64$  (AcOEt/PE (40-60°C) 1:1).  $^1\text{H NMR}$  (400 MHz, DMSO)  $\delta$  9.74 (s, 1H), 9.40 (s, 1H), 8.26 (d,  $J = 8.8$  Hz, 2H), 7.86 (d,  $J = 8.8$  Hz, 2H), 7.68 (d,  $J = 15.6$  Hz, 1H), 7.15 (d,  $J = 15.6$  Hz, 1H).  $^{13}\text{C NMR}$  (101 MHz, DMSO)  $\delta$  195.8, 147.6, 141.4, 138.0, 131.3, 128.9, 124.2. MS (ESI)  $m/z$  calculated for  $\text{C}_9\text{H}_7\text{N}_2\text{O}_2\text{S}$ - [M-H]- 207.0, found 207.2.

### **General method for the synthesis of phenacyl bromides 5a-d**

To a stirred solution of  $\text{Br}_2$  (0.6 mL, 11.00 mmol) in dioxane (12 mL) at  $0^\circ\text{C}$ , a solution of acetophenone or substituted acetophenone **4a-d** (10.00 mmol) in dioxane was added dropwise. The reaction mixture was stirred at room temperature for 30 min. Then the volatiles were removed in vacuo and the crude product was purified by column chromatography using diethyl ether and petroleum ether mixtures as eluent to give the desired product **5a-d**.

### **Phenacyl bromide, 5a**

Following the general method F, using **4a** (1.20 g, 10.00 mmol), **5a** was obtained as white solid (1.38 g) in 70% yield.  $R_f = 0.76$  ( $\text{Et}_2\text{O}/\text{PE}$  (40-60°C) 1:3).  $^1\text{H NMR}$  (200 MHz,  $\text{CDCl}_3$ )  $\delta$  7.75-7.71 (m, 2H), 7.40 – 7.29 (m, 1H), 7.27 – 7.15 (m, 2H), 4.29 (s, 2H).  $^{13}\text{C NMR}$  (101 MHz,  $\text{CDCl}_3$ )  $\delta$  190.5, 133.3, 133.2, 128.2, 128.2, 31.6.

### **4-hydroxy-phenacyl bromide, 5b**

Following the general method F, using **4b** (1.36 g, 10.00 mmol), **5b** was obtained as white solid (1.31g) in 62% yield.  $R_f = 0.48$  ( $\text{Et}_2\text{O}/\text{PE}$  (40-60°C) 1:1).  $^1\text{H NMR}$  (200 MHz, DMSO)  $\delta$  10.56 (s, 1H), 7.89 (d,  $J = 8.8$  Hz, 2H), 6.87 (d,  $J = 8.7$  Hz, 2H), 4.78 (s, 2H).  $^{13}\text{C NMR}$  (50 MHz, DMSO)  $\delta$  190.0, 162.8, 131.6, 125.5, 115.5, 33.7.

### **4-methoxy-phenacyl bromide, 5c**

Following the general method F, using **4c** (1.50 g, 10.00 mmol), **5c** was obtained as white solid (1.17 g) in 56% yield.  $R_f = 0.64$  ( $\text{Et}_2\text{O}/\text{PE}$  (40-60°C) 1:1).  $^1\text{H NMR}$  (400 MHz, DMSO)  $\delta$  7.99 (d,  $J = 8.9$  Hz, 2H), 7.07 (d,  $J = 7.3$  Hz, 2H), 4.83 (s, 2H), 3.86 (s, 3H).  $^{13}\text{C NMR}$  (101 MHz, DMSO)  $\delta$  190.2, 163.6, 131.2, 126.8, 114.1, 55.6, 33.6.



NGI69\_kl.3-4  
1H

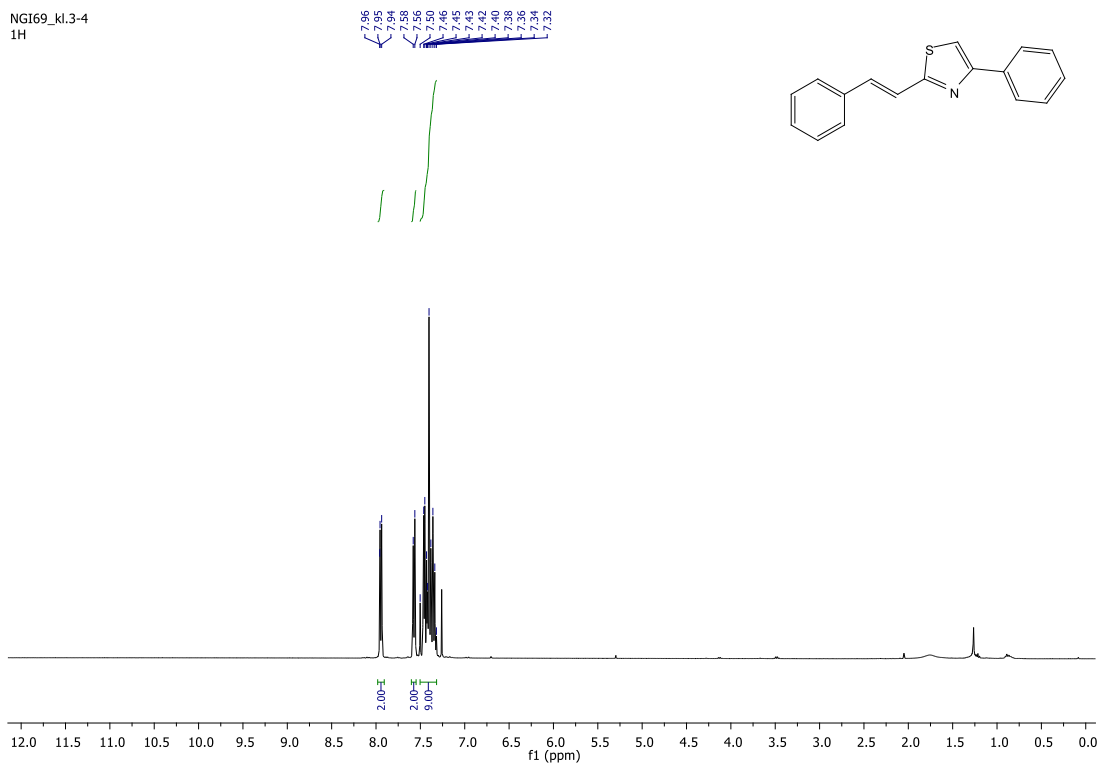

Figure 1 :  $^1\text{H}$  NMR of **6a** in  $\text{CDCl}_3$ .

NGI69\_kl.3-4  
13C

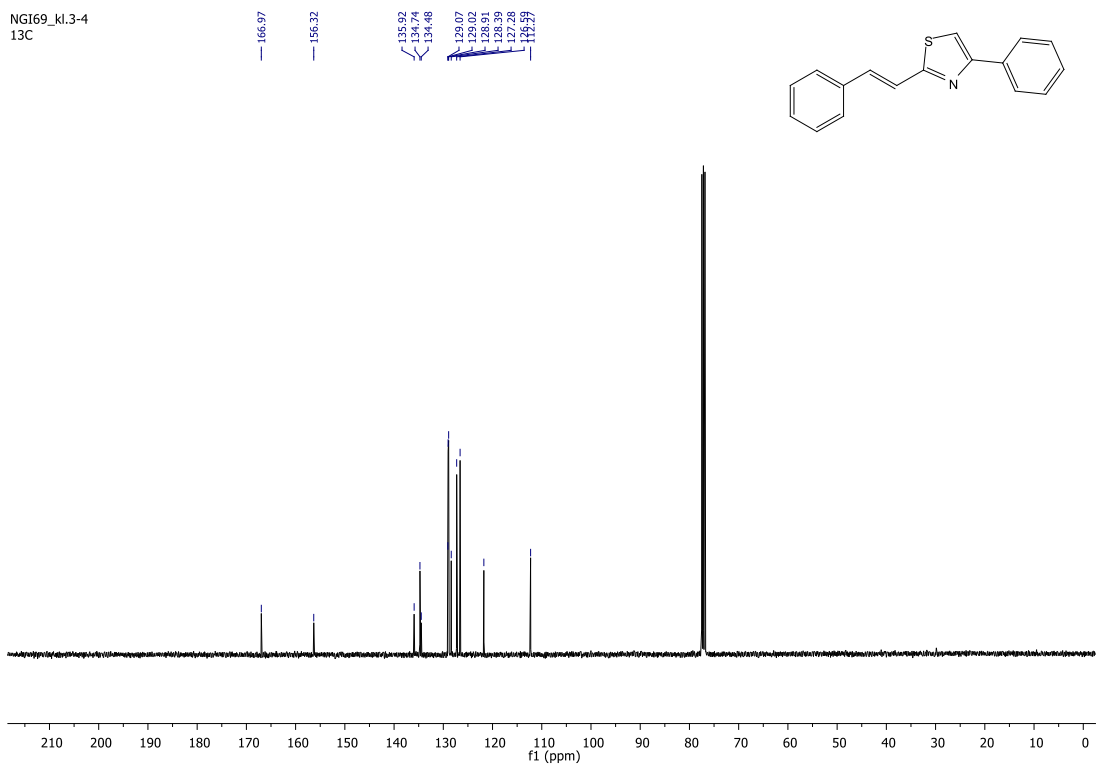

Figure 2 :  $^{13}\text{C}$  NMR of **6a** in  $\text{CDCl}_3$ .

NG169\_ESI+75 #26 RT: 0.22 AV: 1 NL: 1.17E6  
T: {0,0} + p ESI!corona sid=75.00 det=1306.00 Full r

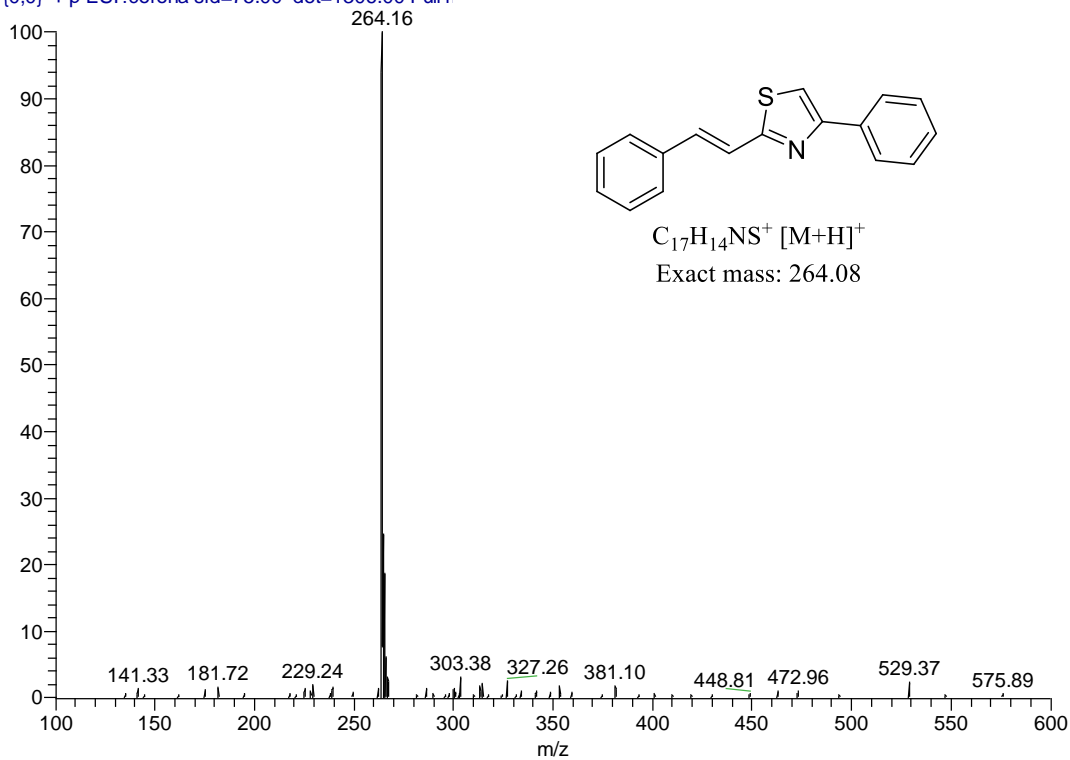

Figure 3: ESI-MS of 6a.

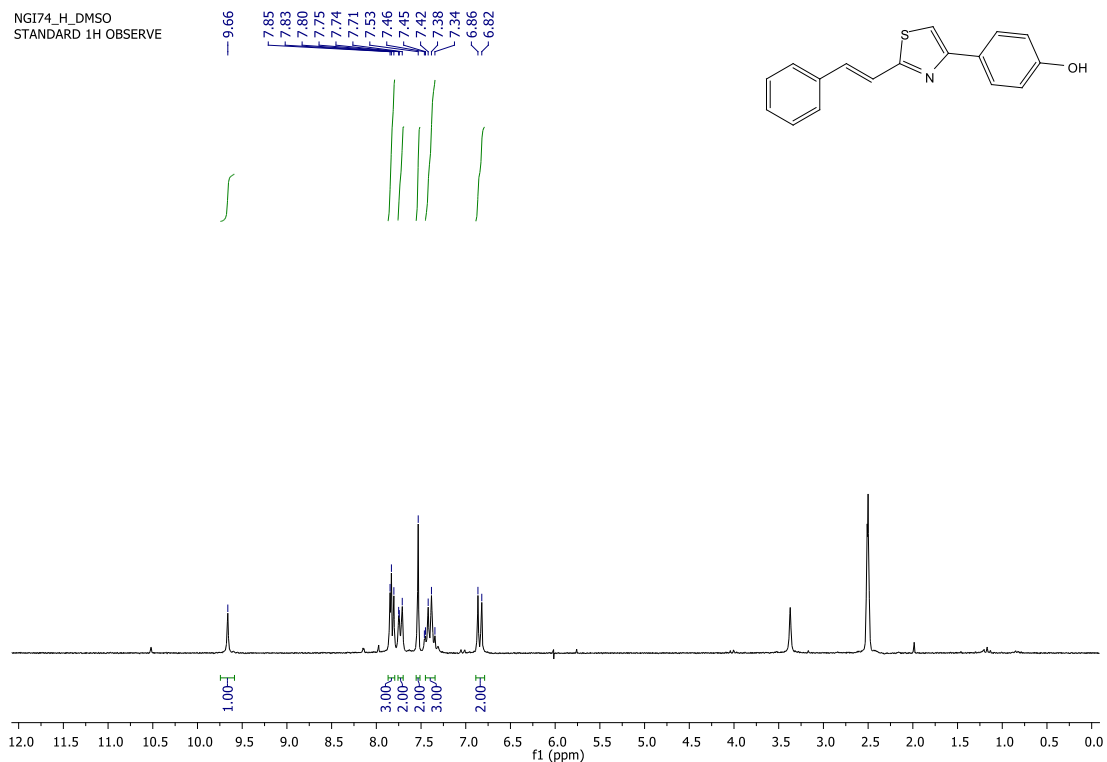

Figure 4:  $^1H$  NMR of 6b in DMSO.

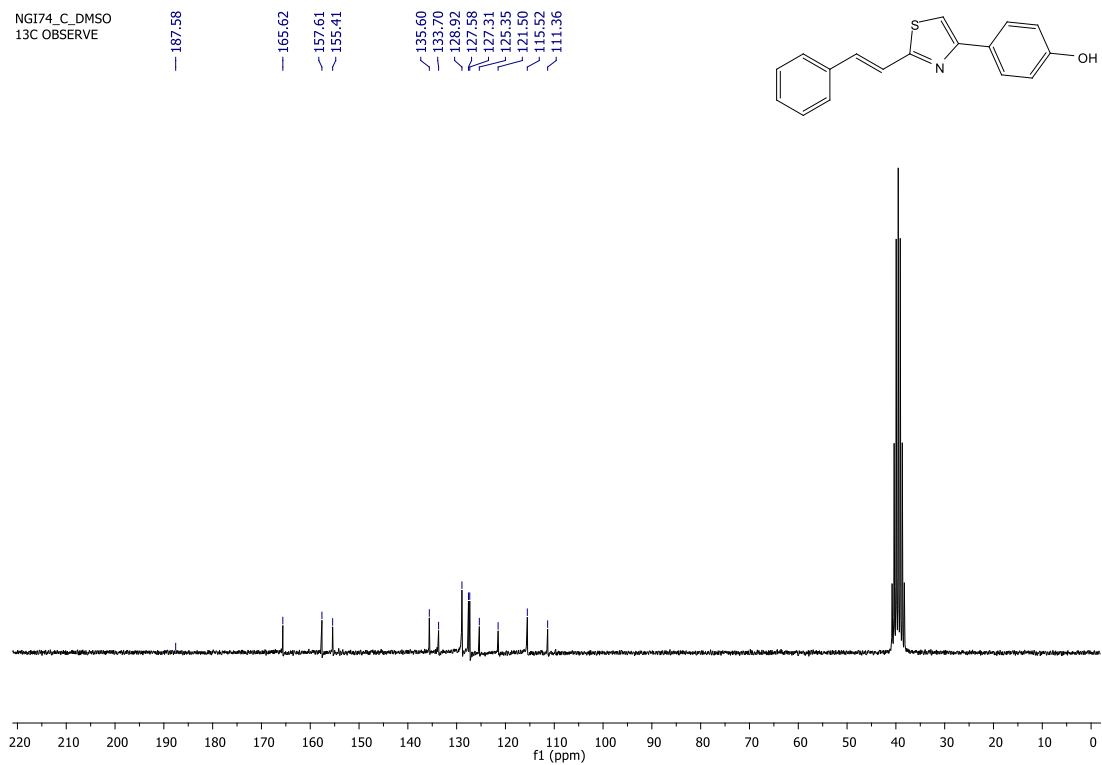

**Figure 5:**  $^{13}\text{C}$  NMR of **6b** in DMSO.

NGI74\_ESI+50 #15 RT: 0.12 AV: 1 NL: 3.84E6  
T: {0,0} + p ESI!corona sid=50.00 det=1306.00 Full r

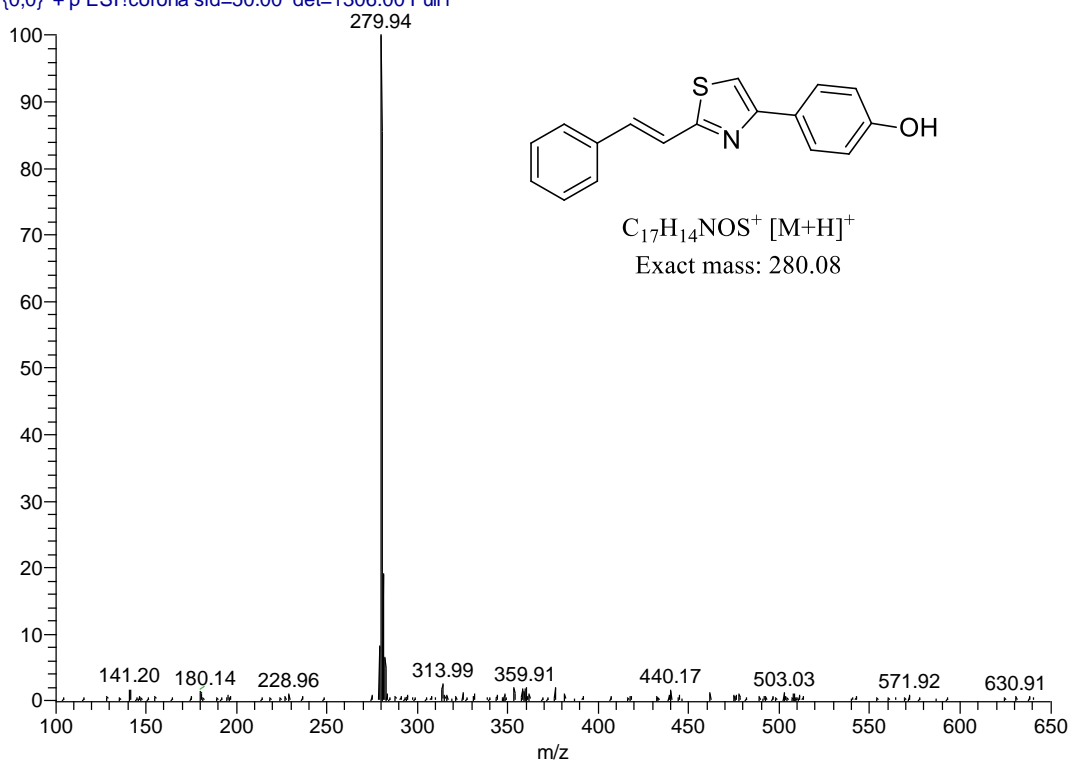

**Figure 6:** ESI-MS of **6b**.

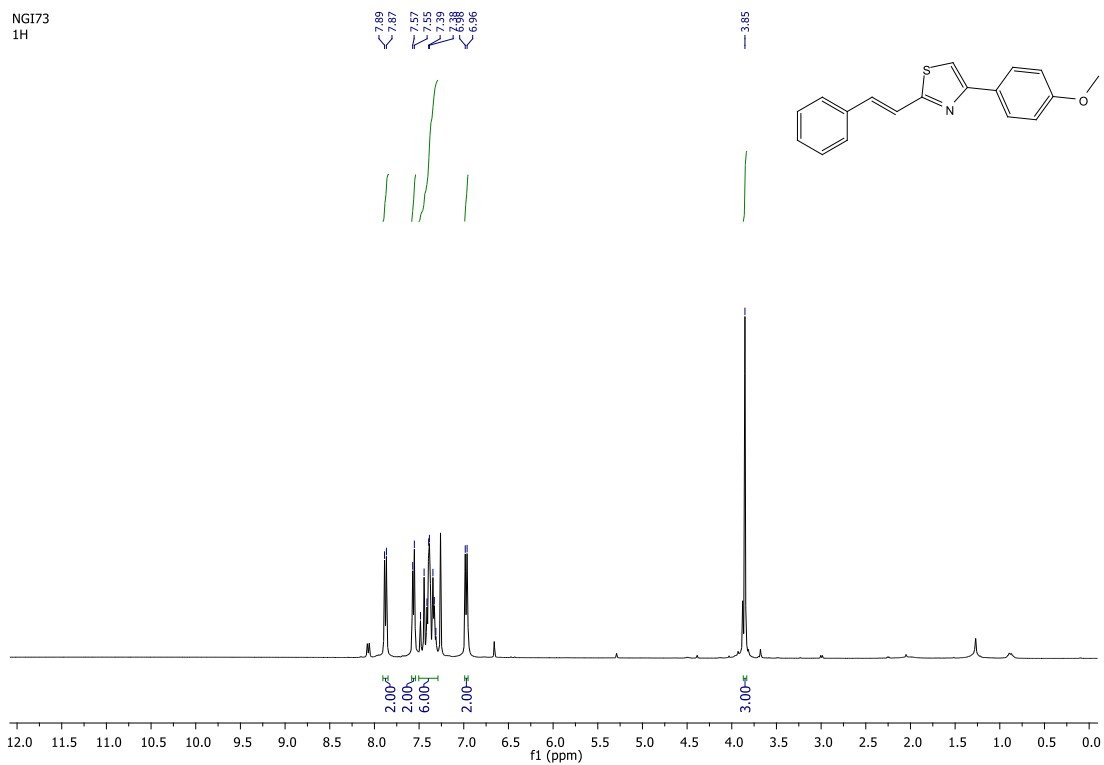

Figure 7:  $^1\text{H}$  NMR of 6c in  $\text{CDCl}_3$ .

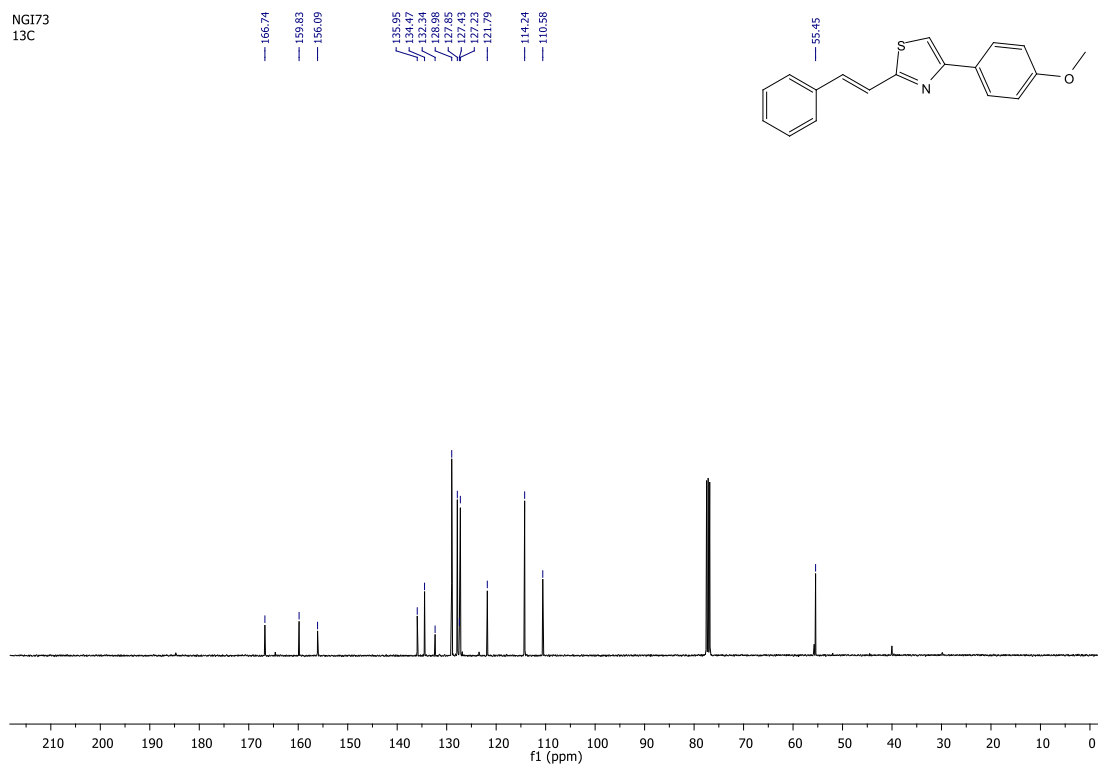

Figure 8:  $^{13}\text{C}$  NMR of 6c in  $\text{CDCl}_3$ .

NGI73\_ESI+50 #10 RT: 0.08 AV: 1 NL: 5.93E6  
T: {0,0} + p ESI!corona sid=50.00 det=1306.00 Full r

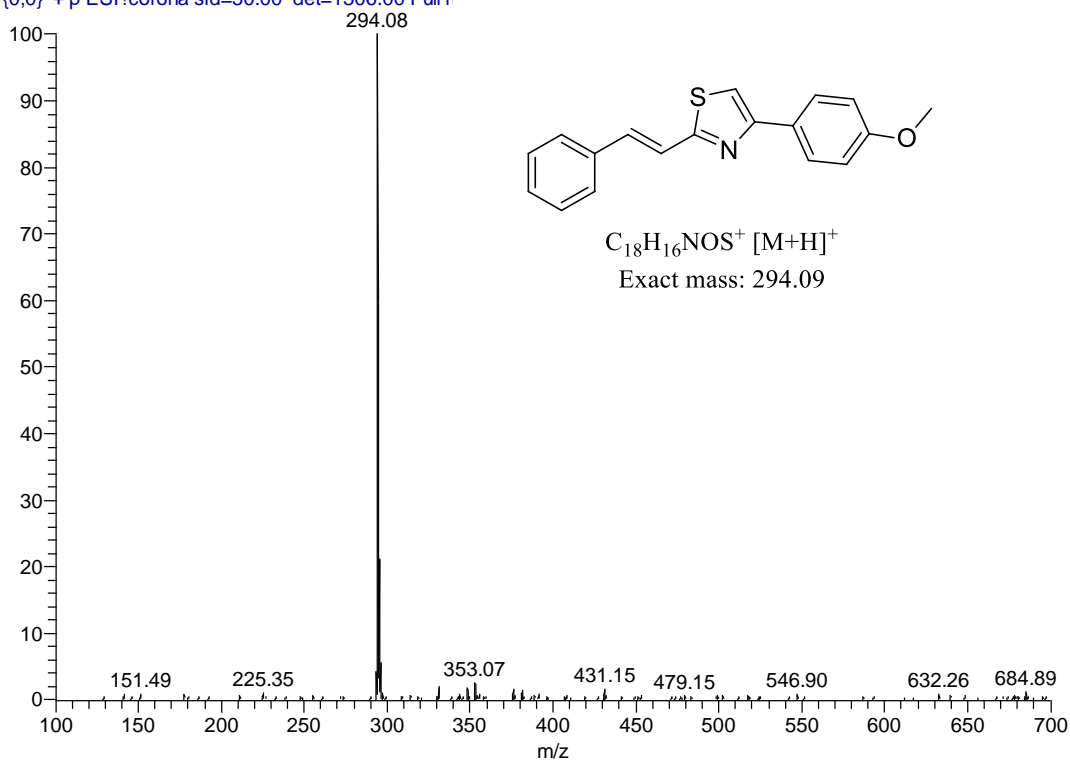

Figure 9: ESI-MS of 6c.

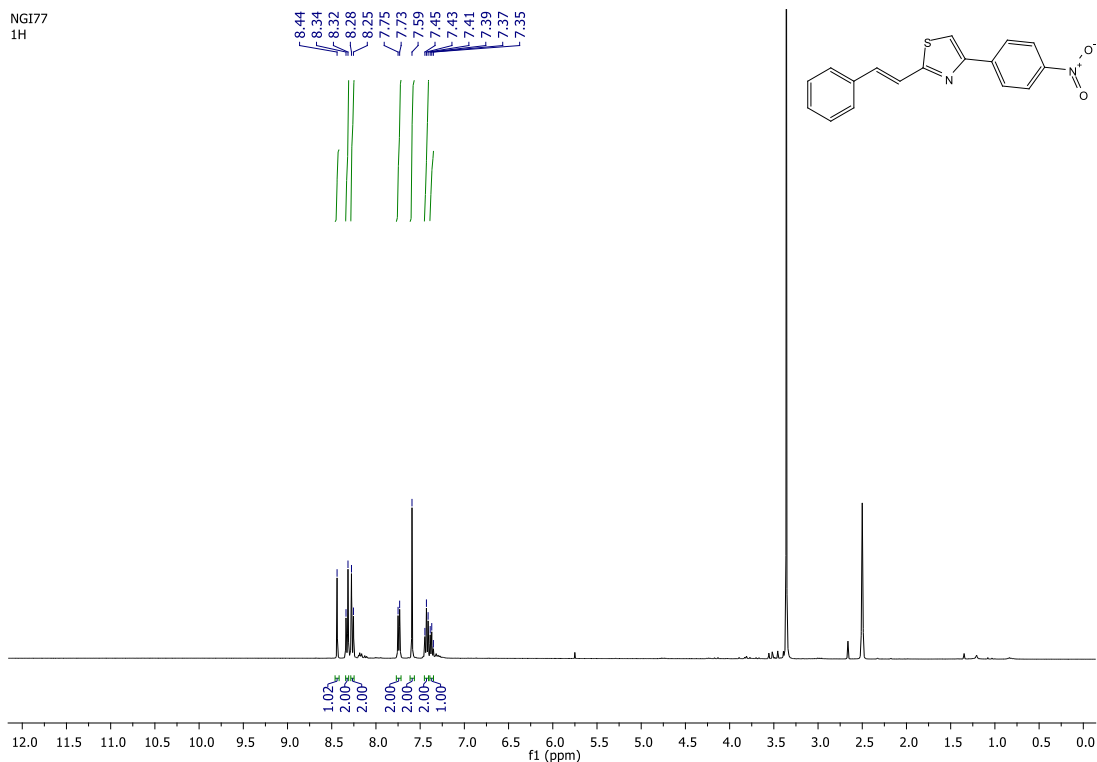

Figure 10:  $^1H$  NMR of 6d in DMSO.

NG177  
13C

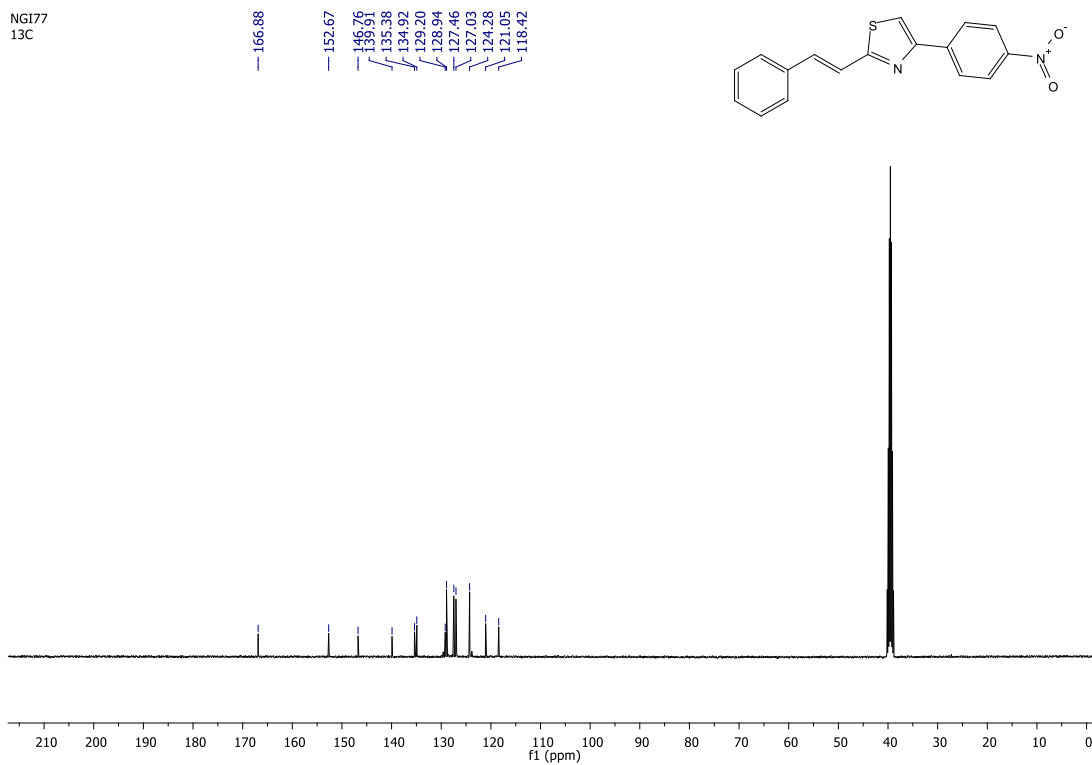

Figure 11:  $^{13}\text{C}$  NMR of **6d** in DMSO.

NG177\_ESI+50 #34 RT: 0.29 AV: 1 NL: 4.40E5  
T: {0,0} + p ESI!corona sid=50.00 det=1306.00 Full r

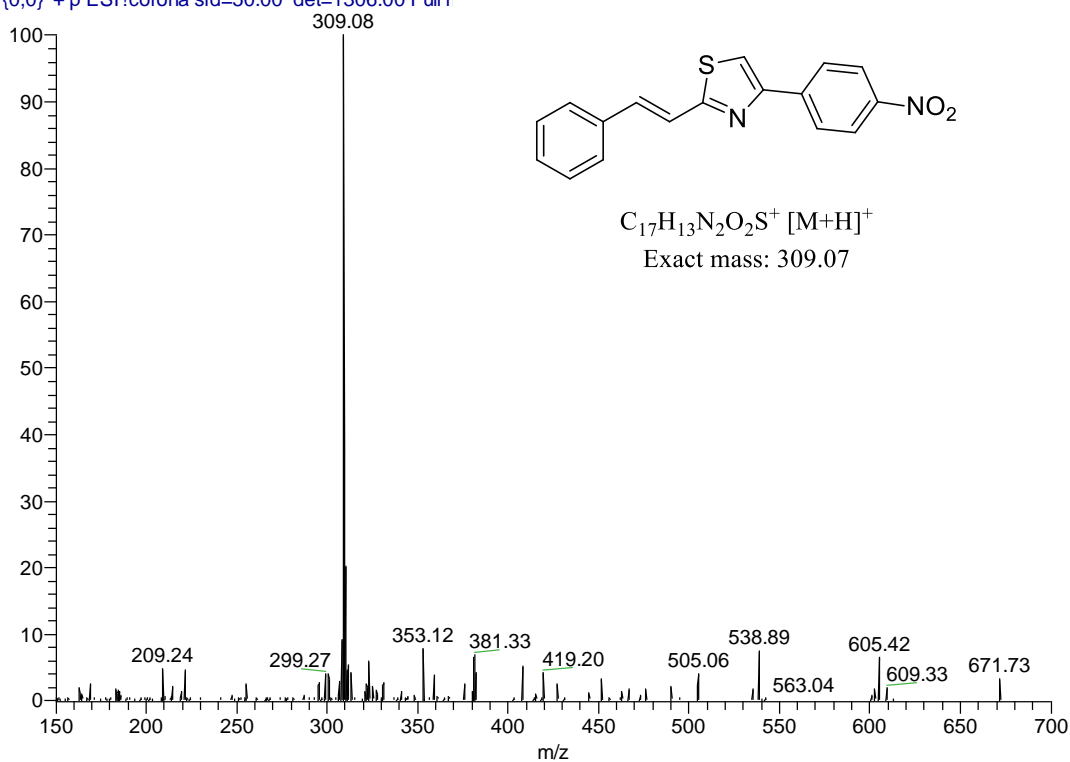

Figure 12: ESI-MS of **6d**.

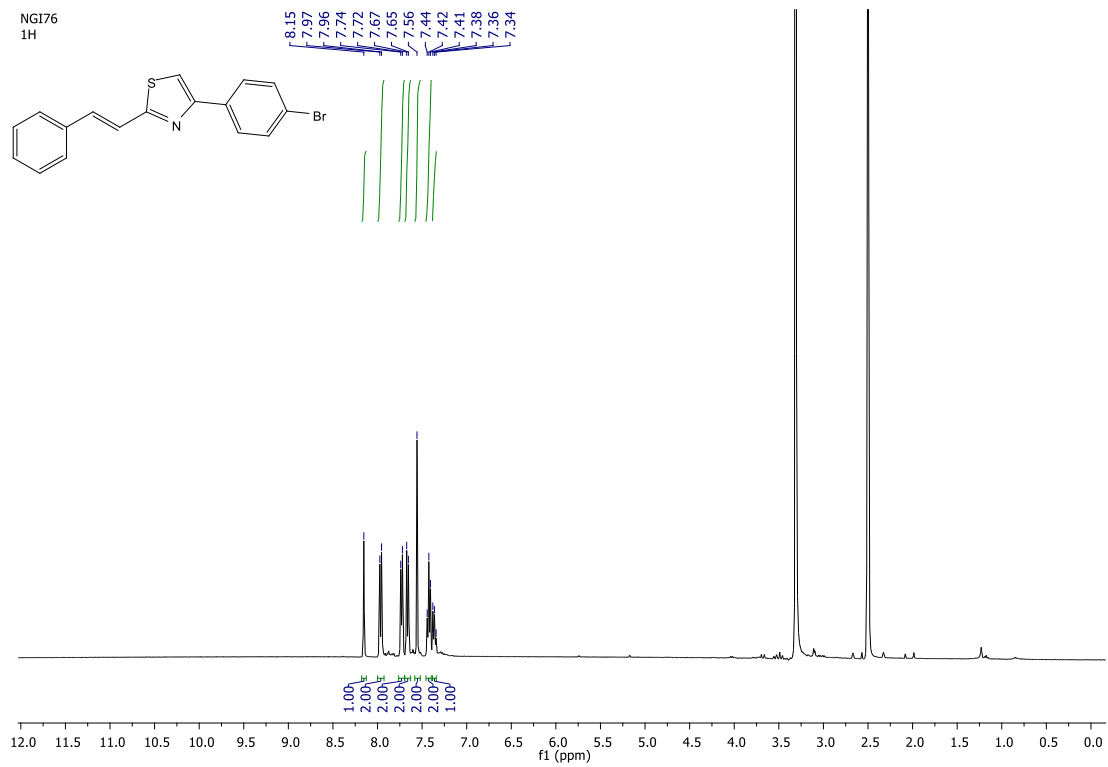

Figure 13:  $^1\text{H}$  NMR of **6e** in DMSO.

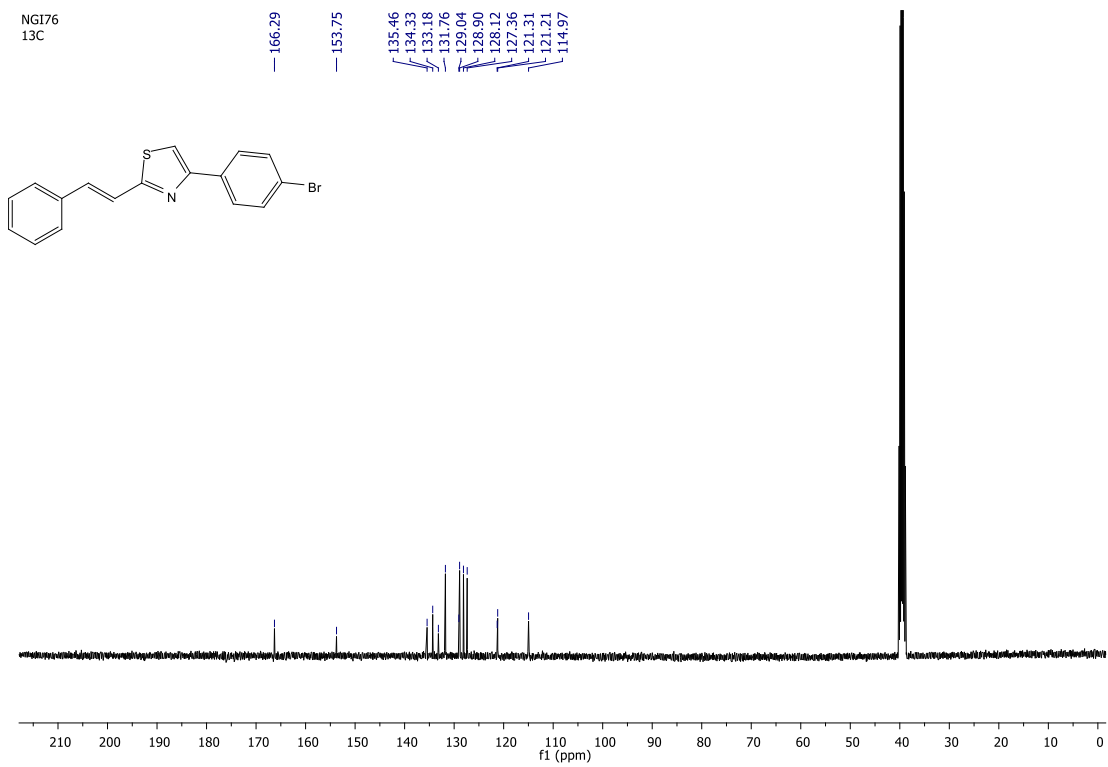

Figure 14:  $^{13}\text{C}$  NMR of **6e** in DMSO.

NGI76\_ESI+75 #1-75 RT: 0.00-0.65 AV: 75 SB: 8 0.00-0.06 NL: 2.08E4  
T: {0,0} +p ESI!corona sid=75.00 det=1306.00 Full r

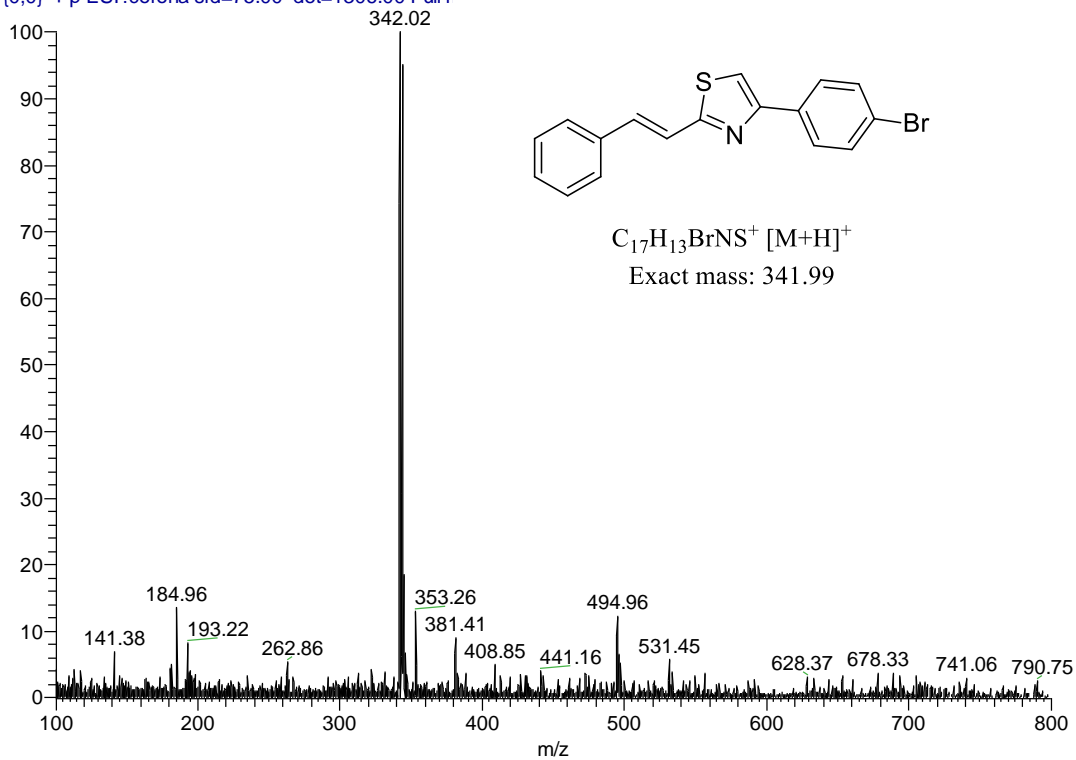

Figure 15: ESI-MS of 6e.

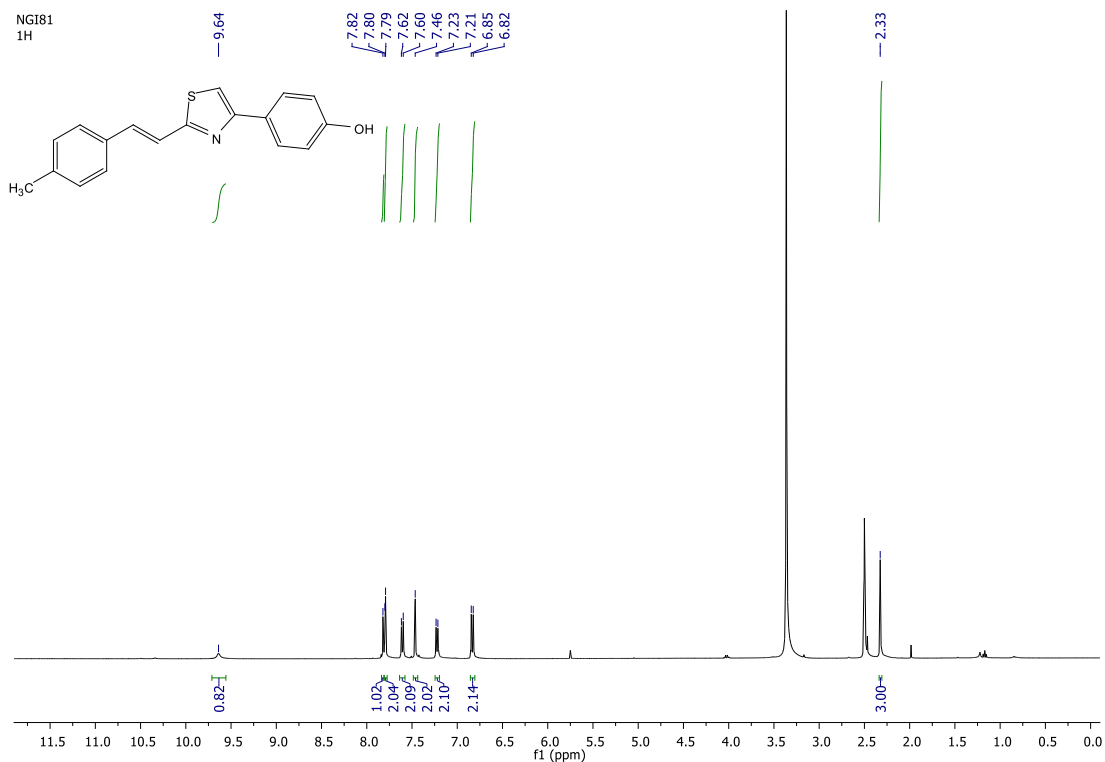

Figure 16:  $^1\text{H}$  NMR of 6f in DMSO.



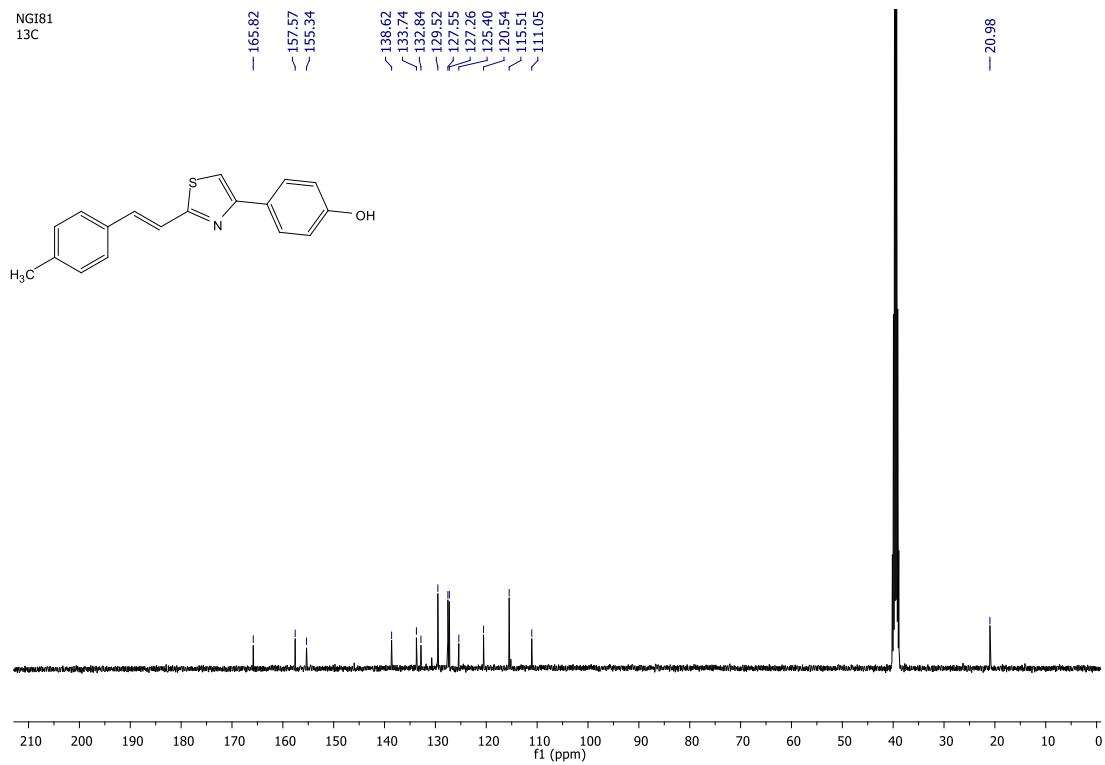

Figure 17: <sup>13</sup>C NMR of 6f in DMSO.

NGI81\_ESI\_50 #1-36 RT: 0.00-0.31 AV: 36 NL: 1.67E5  
T: {0,0} - p ESI!corona sid=50.00 det=1306.00 Full r

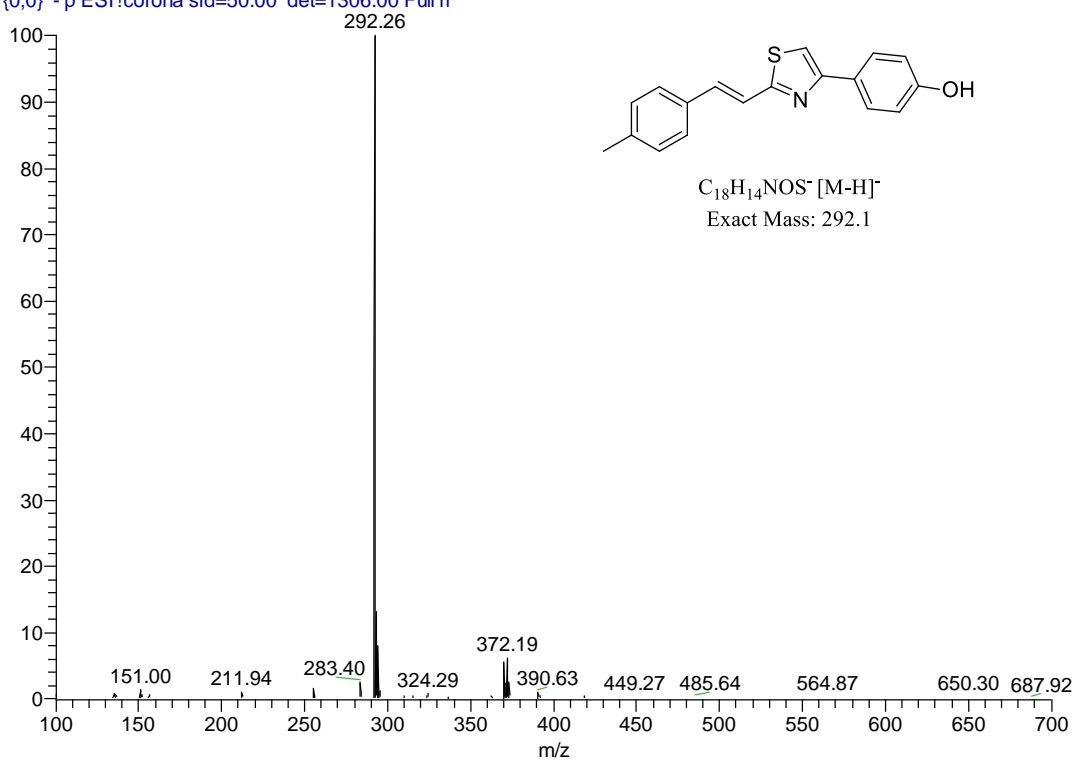

Figure 18: ESI-MS of 6f.

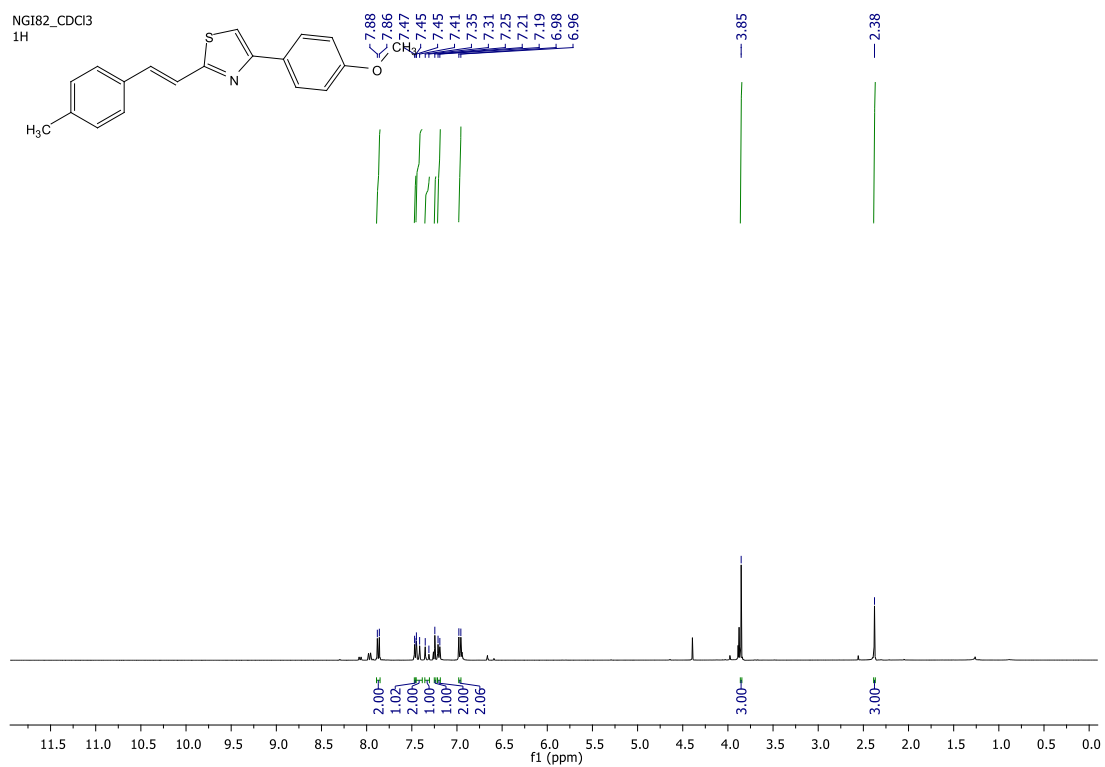

**Figure 19:** <sup>1</sup>H NMR of **6g** in CDCl<sub>3</sub>.

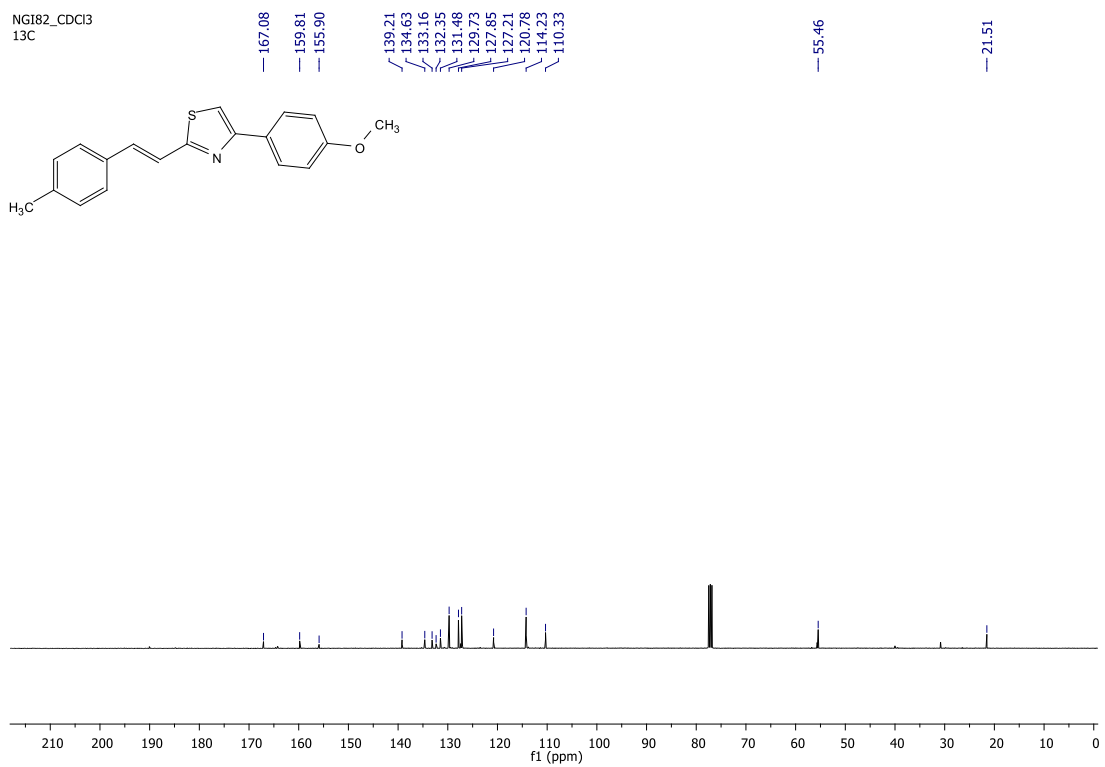

**Figure 20:** <sup>13</sup>C NMR of **6g** in CDCl<sub>3</sub>.

NG182\_ESI+75 #1-61 RT: 0.00-0.53 AV: 61 NL: 4.87E4  
T: {0,0} + p ESI!corona sid=75.00 det=1306.00 Full r

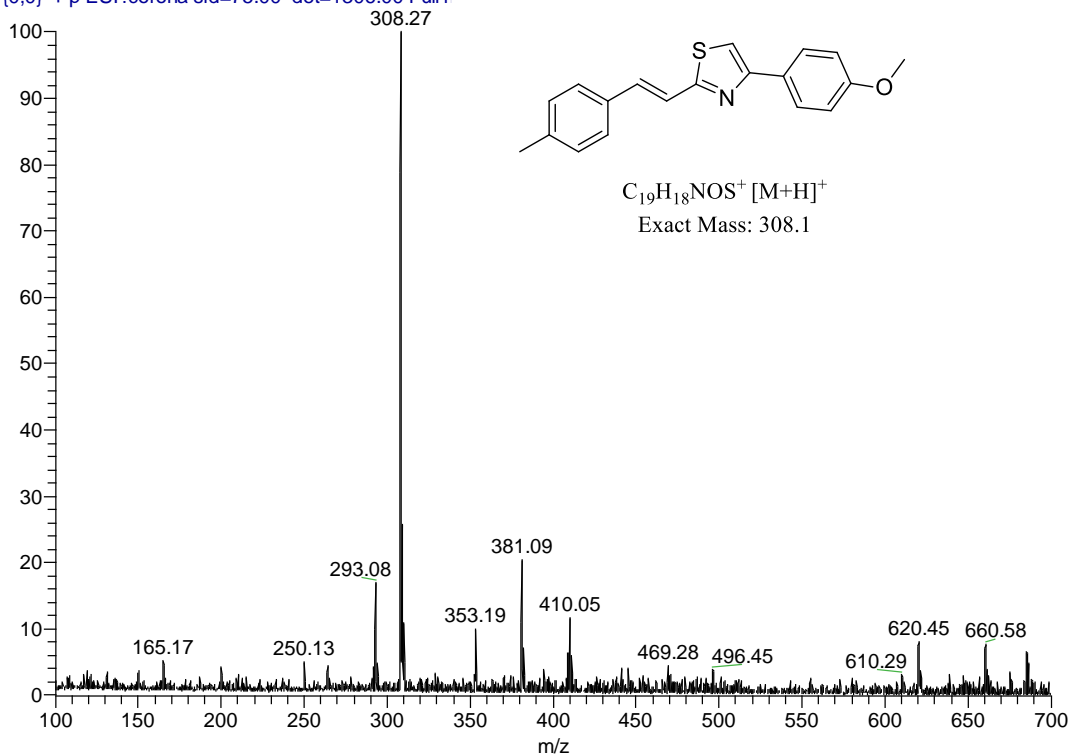

Figure 21: ESI-MS of **6g**.

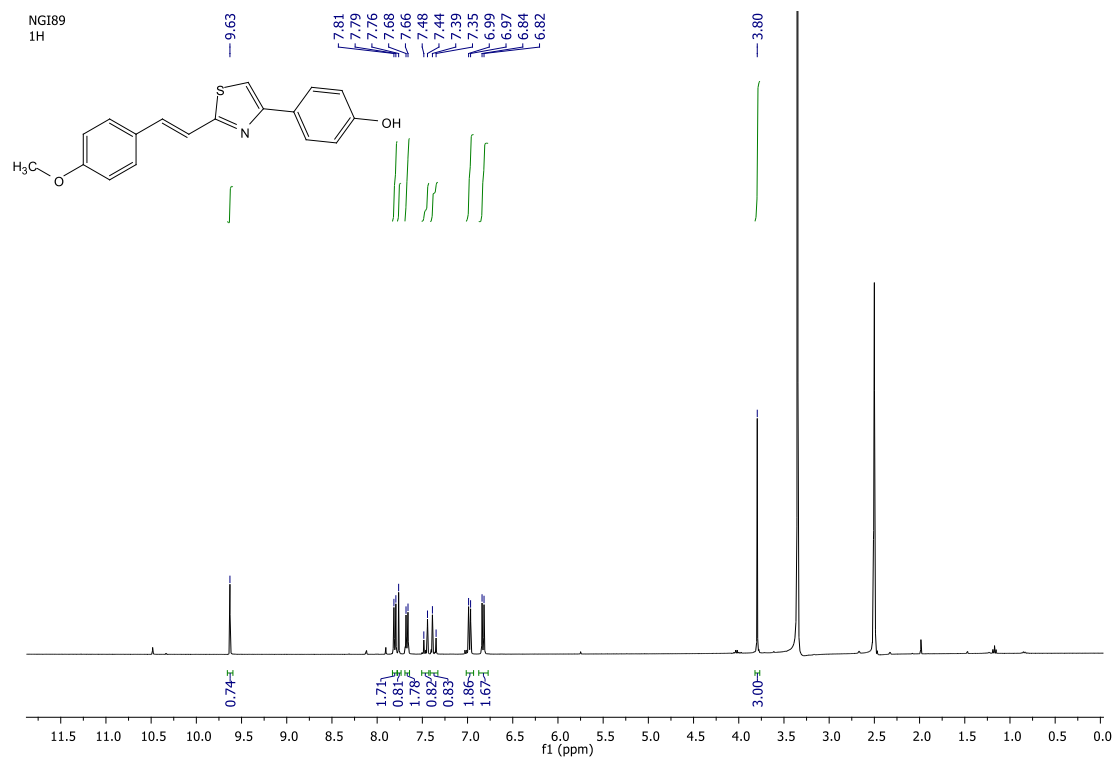

Figure 22:  $^1H$  NMR of **6h** in DMSO.

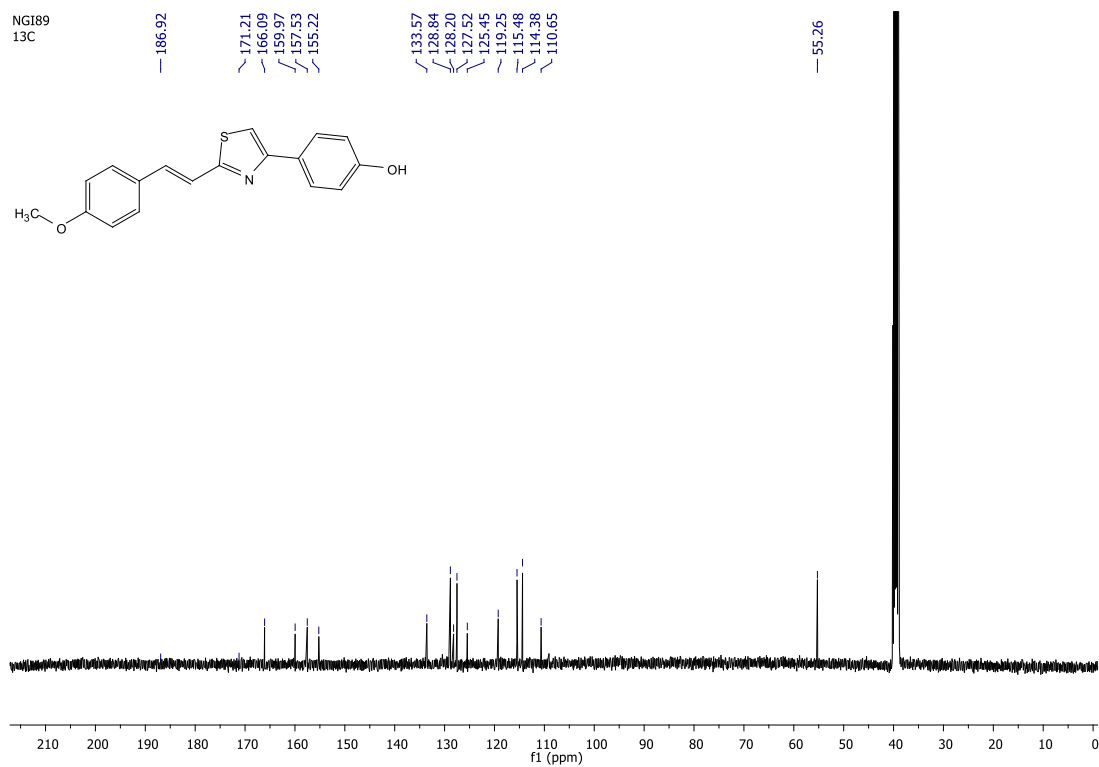

**Figure 23:** <sup>13</sup>C NMR of **6h** in DMSO.

NGI89\_ESI+50 #16 RT: 0.51 AV: 1 NL: 2.64E5  
T: {0,0} + p ESI !corona sid=50.00 det=1306.00 Full r

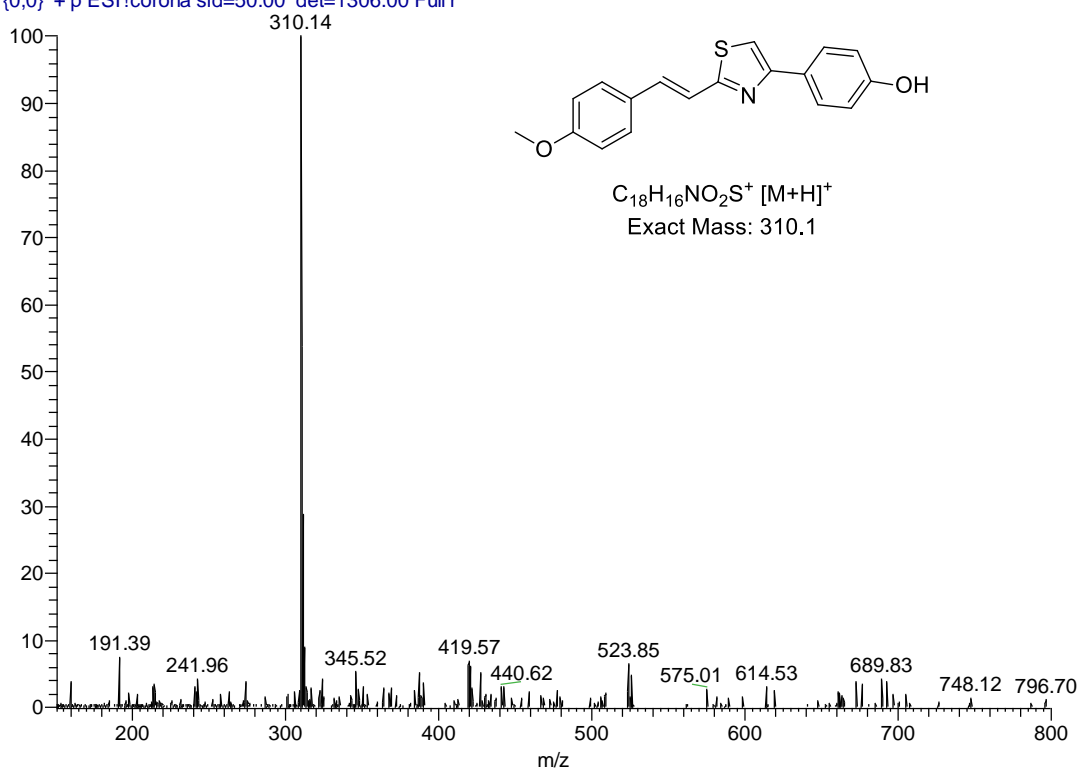

**Figure 24:** ESI-MS of **6h**.

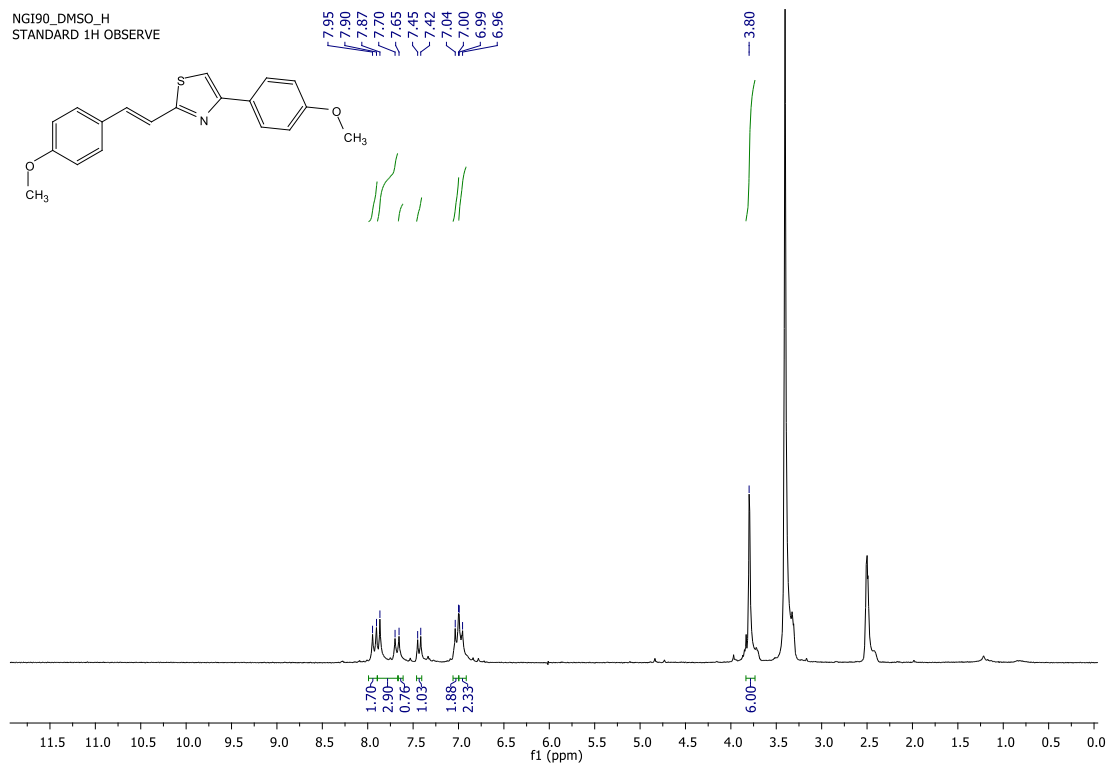

**Figure 25:**  $^1\text{H}$  NMR of **6i** in DMSO.

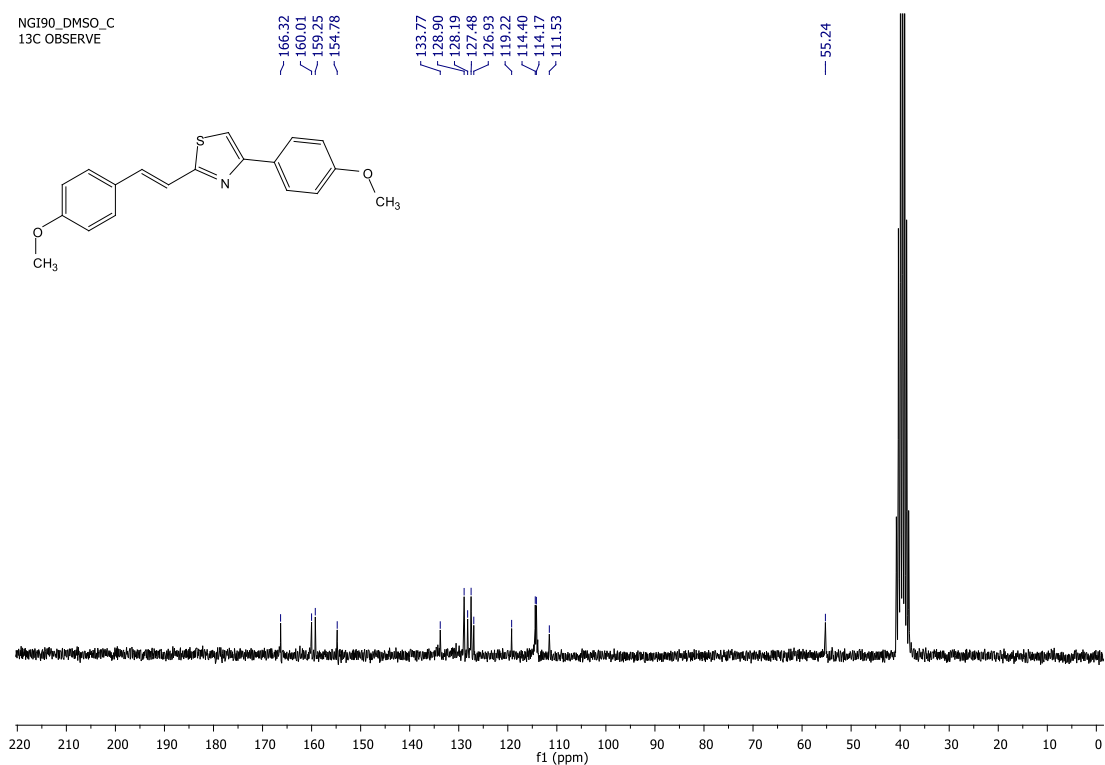

**Figure 26:**  $^{13}\text{C}$  NMR of **6i** in DMSO.

NGI90\_ESI-50 #1-19 RT: 0.00-0.61 AV: 19 NL: 2.48E5  
T: {0,0} + p ESI!corona sid=50.00 det=1306.00 Full r

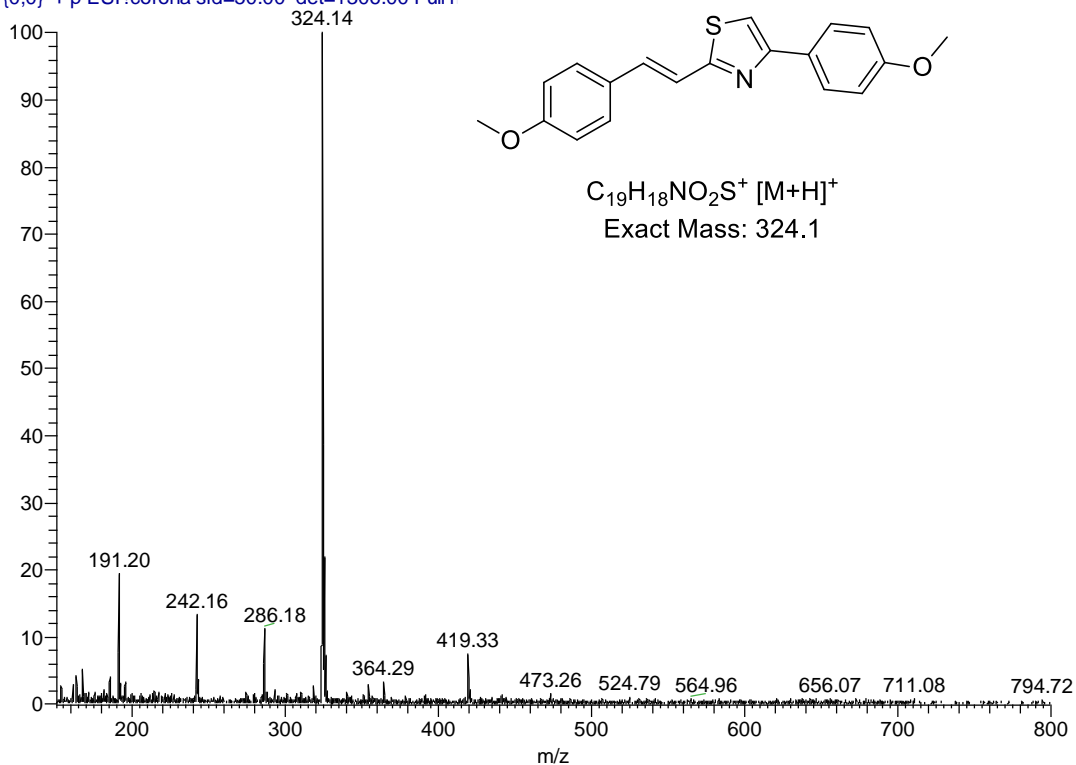

Figure 27: ESI-MS of 6i.

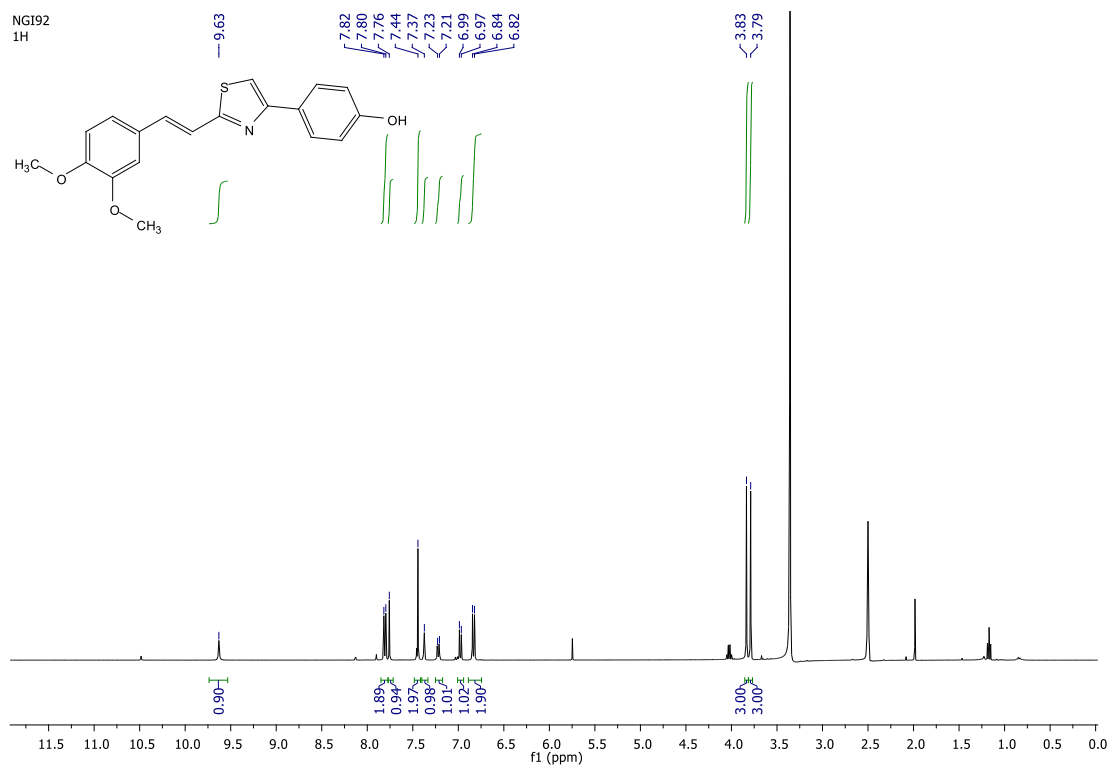

Figure 28:  $^1H$  NMR of 6j in DMSO.

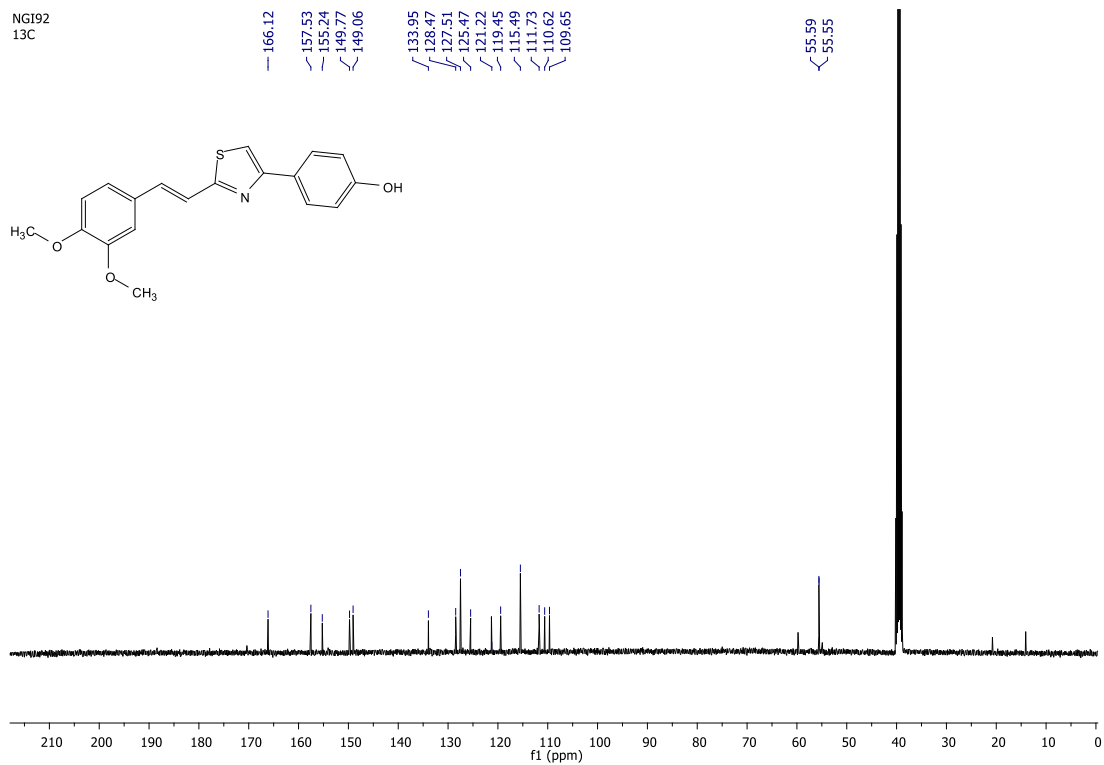

Figure 29:  $^{13}\text{C}$  NMR of **6j** in DMSO.

NGI92\_ESH+50 #9 RT: 0.27 AV: 1 NL: 1.29E6  
T: {0,0} + p ESI !corona sid=50.00 det=1306.00 Full r

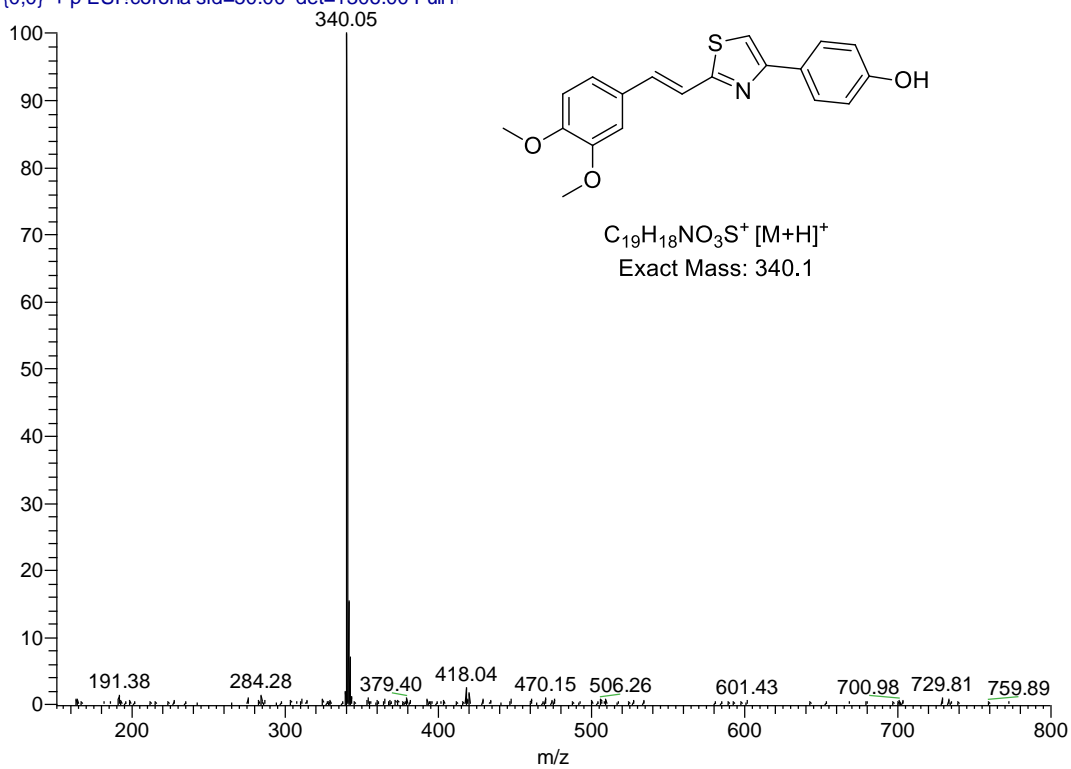

Figure 30: ESI-MS of **6j**.

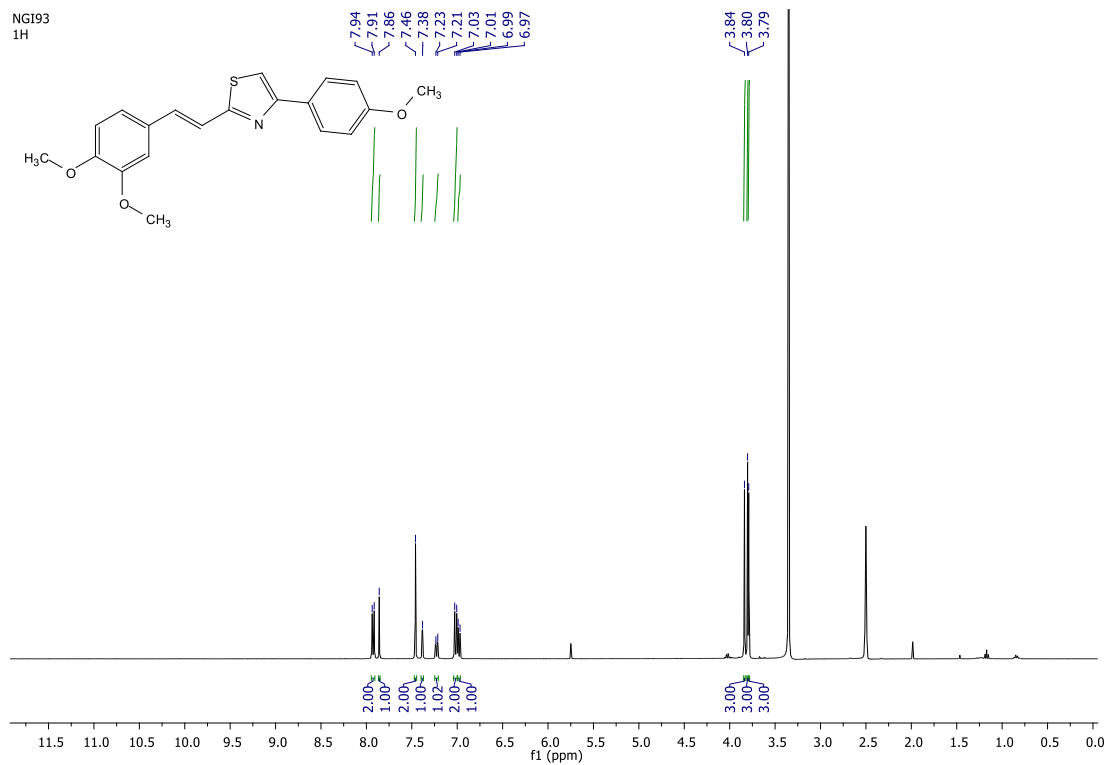

Figure 31:  $^1\text{H}$  NMR of **6k** in DMSO.

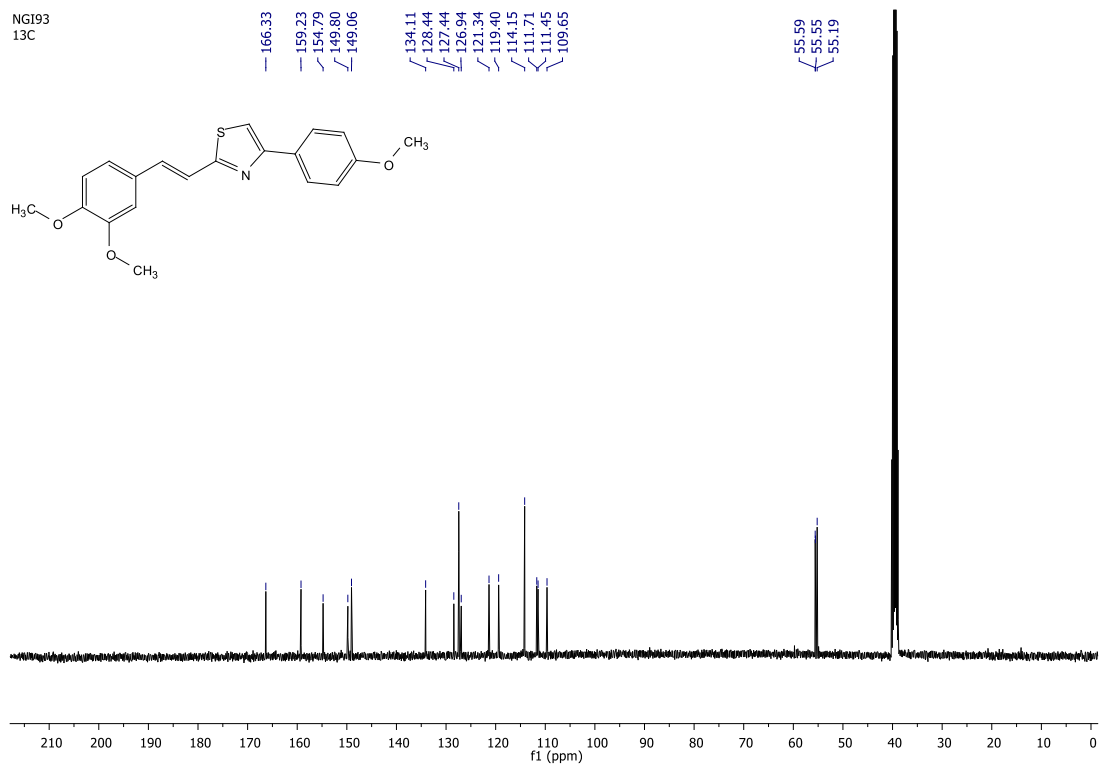

Figure 32:  $^{13}\text{C}$  NMR of **6k** in DMSO.



NGI93\_ESI+50 #10 RT: 0.30 AV: 1 NL: 9.62E5  
T: {0,0} + p ESI!corona sid=50.00 det=1306.00 Full r

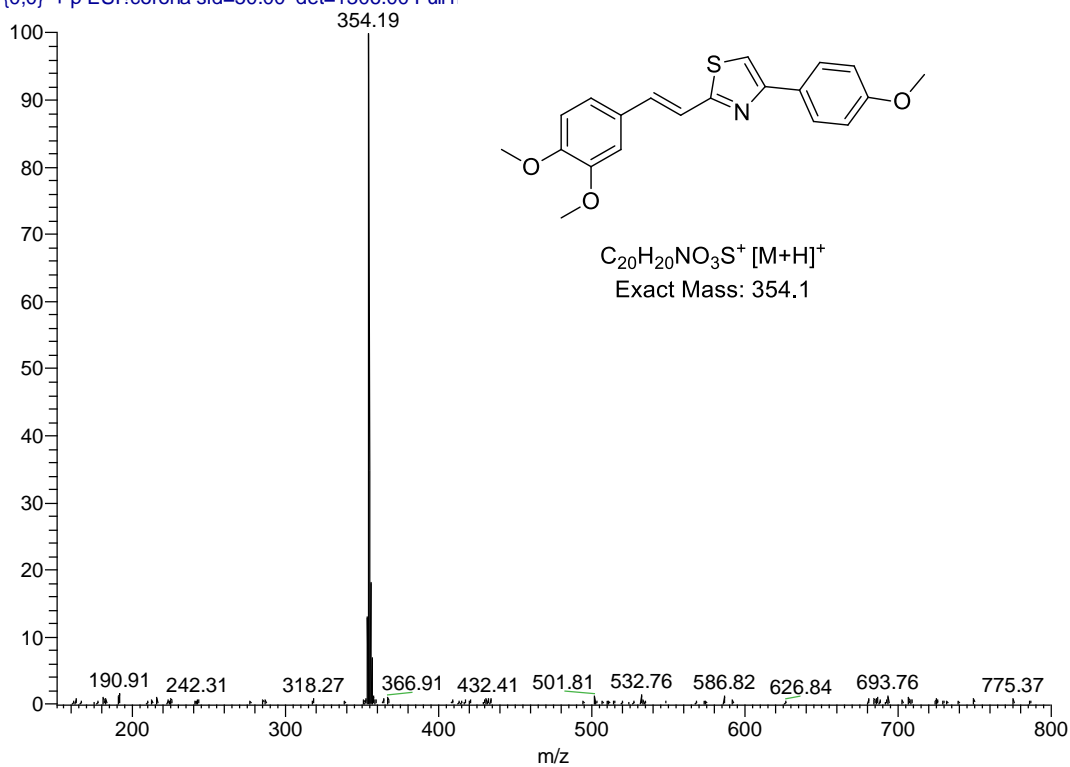

Figure 33: ESI-MS of **6k**.

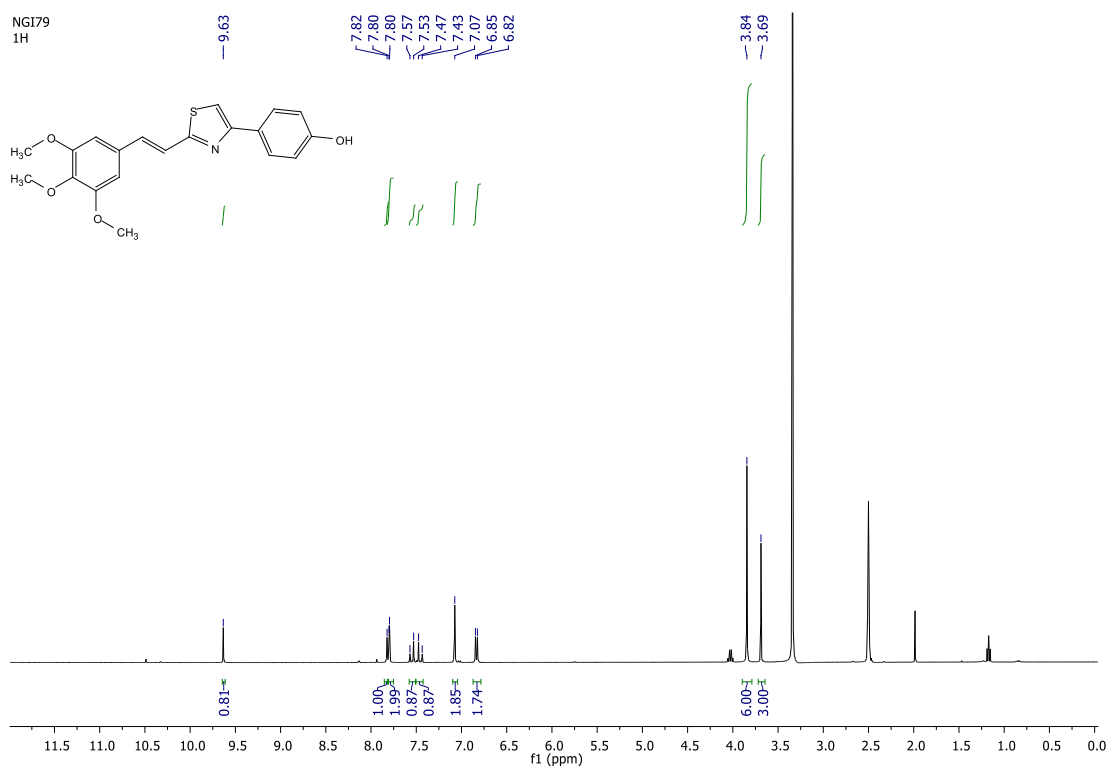

Figure 34:  $^1H$  NMR of **6l** in DMSO.

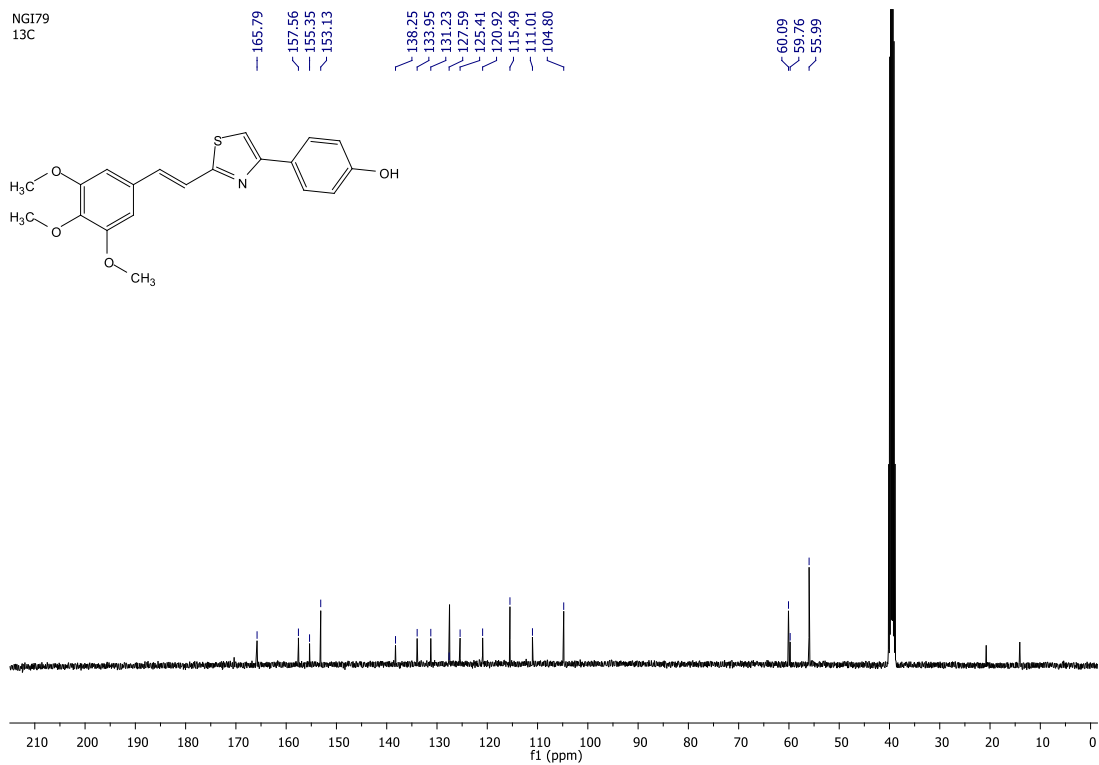

**Figure 35:**  $^{13}\text{C}$  NMR of **6l** in DMSO.

NGI79\_ESI+50 #14-64 RT: 0.11-0.56 AV: 51 SB: 8 0.00-0.06 NL: 2.80E5  
T: {0,0} +p ESI!corona sid=50.00 det=1306.00 Full r

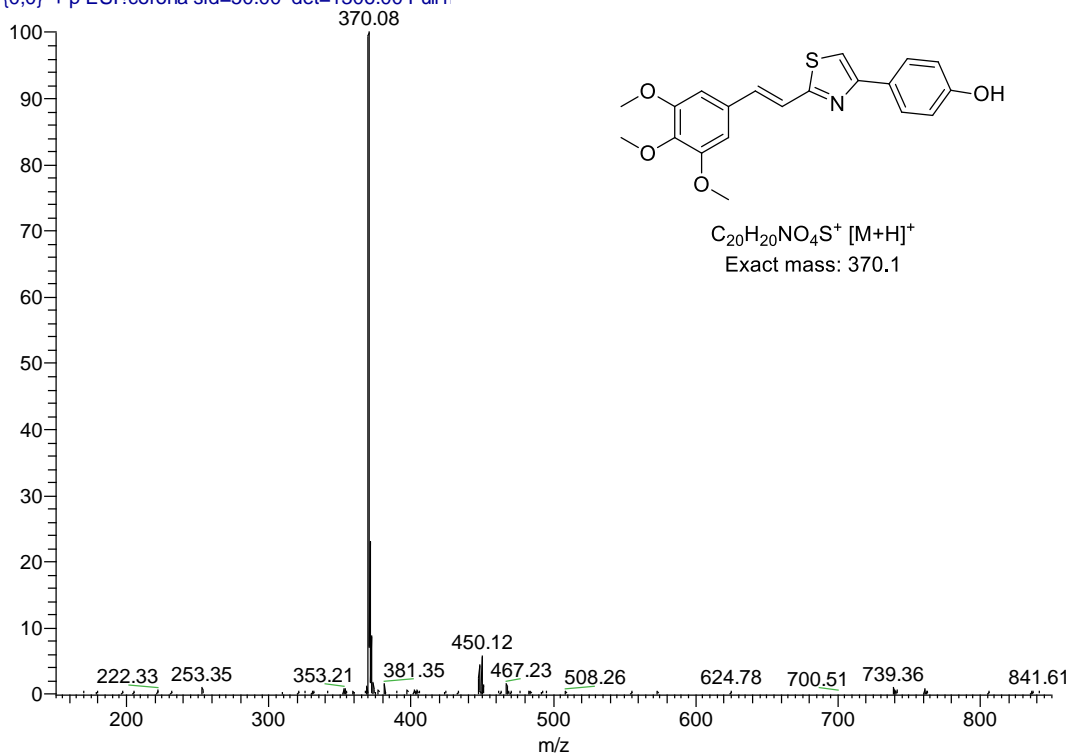

**Figure 36:** ESI-MS of **6l**.

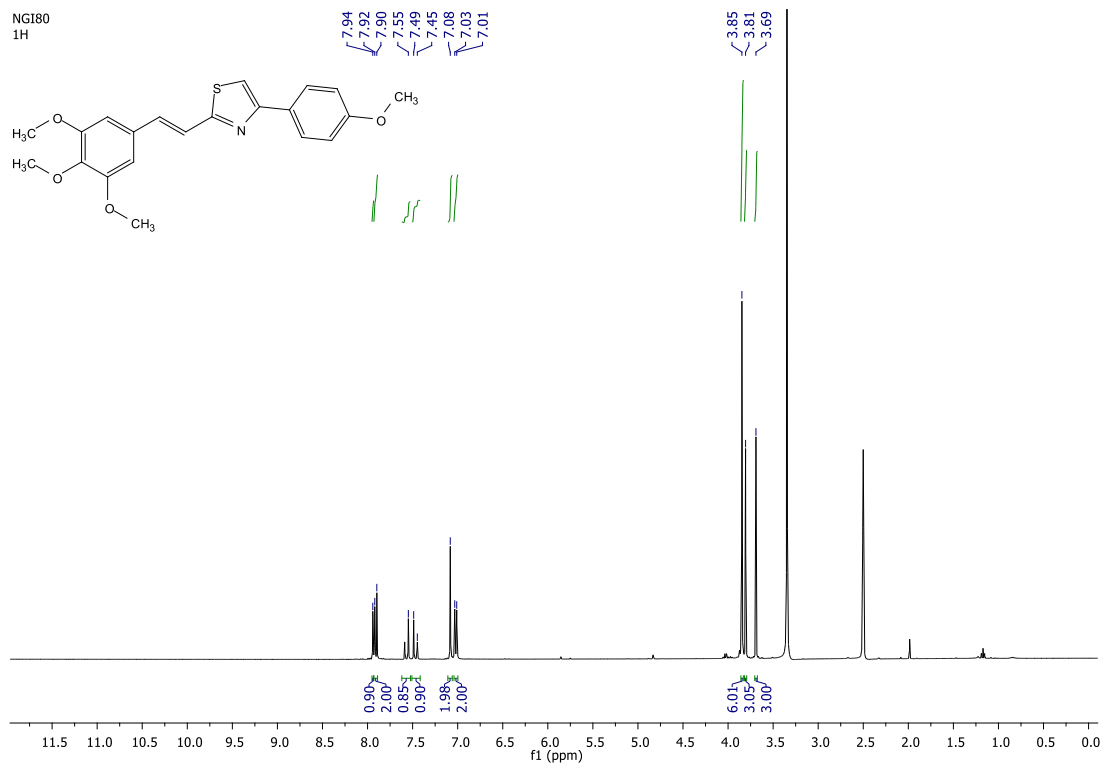

Figure 37: <sup>1</sup>H NMR of **6m** in DMSO.

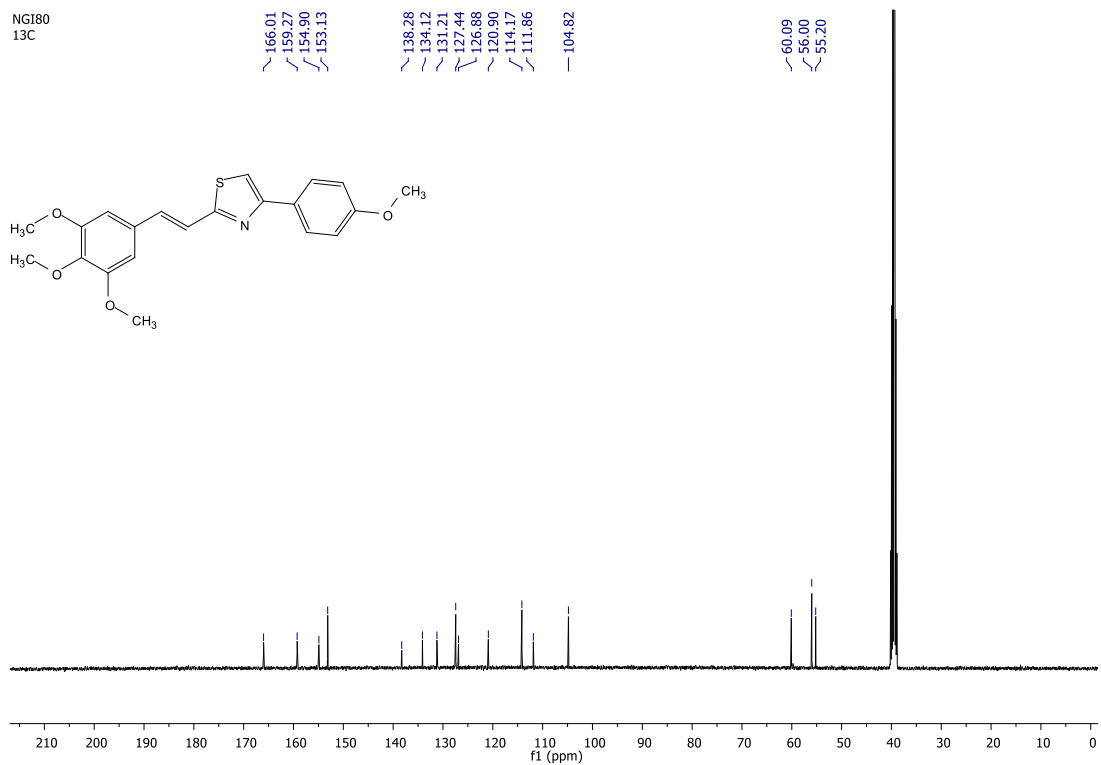

Figure 38: <sup>13</sup>C NMR of **6m** in DMSO.

NG180\_ESI+50 #1-60 RT: 0.00-0.52 AV: 60 NL: 3.40E4  
T: {0,0} +p ESI!corona sid=50.00 det=1306.00 Full r

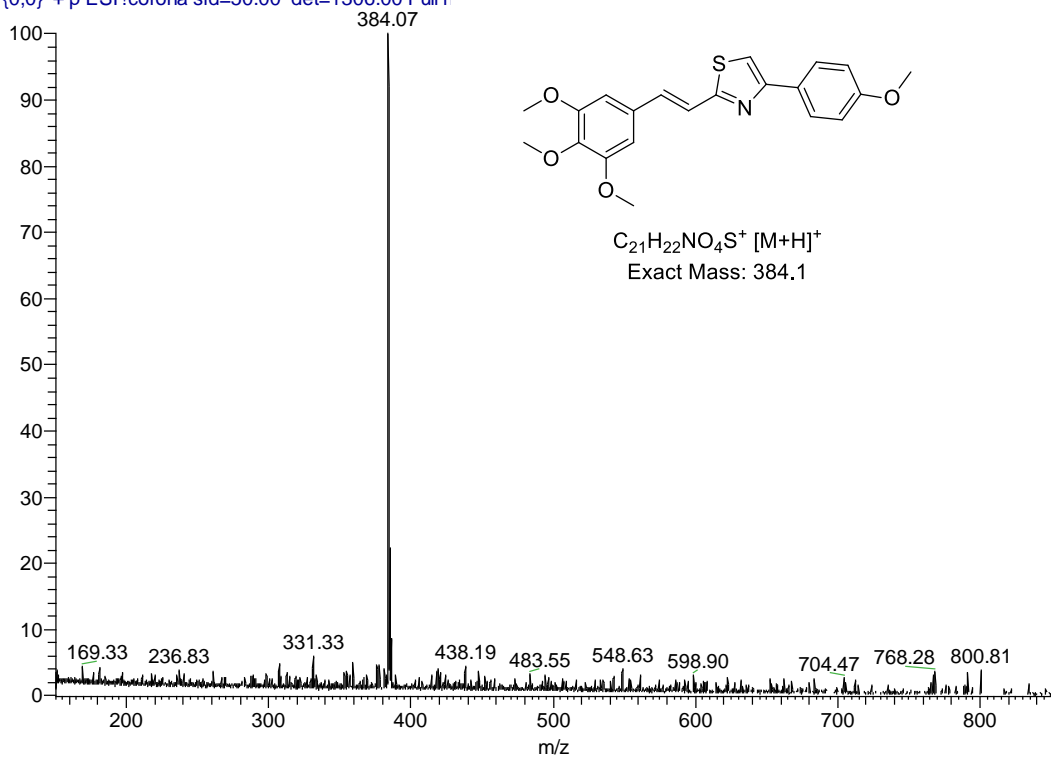

Figure 39: ESI-MS of 6m.

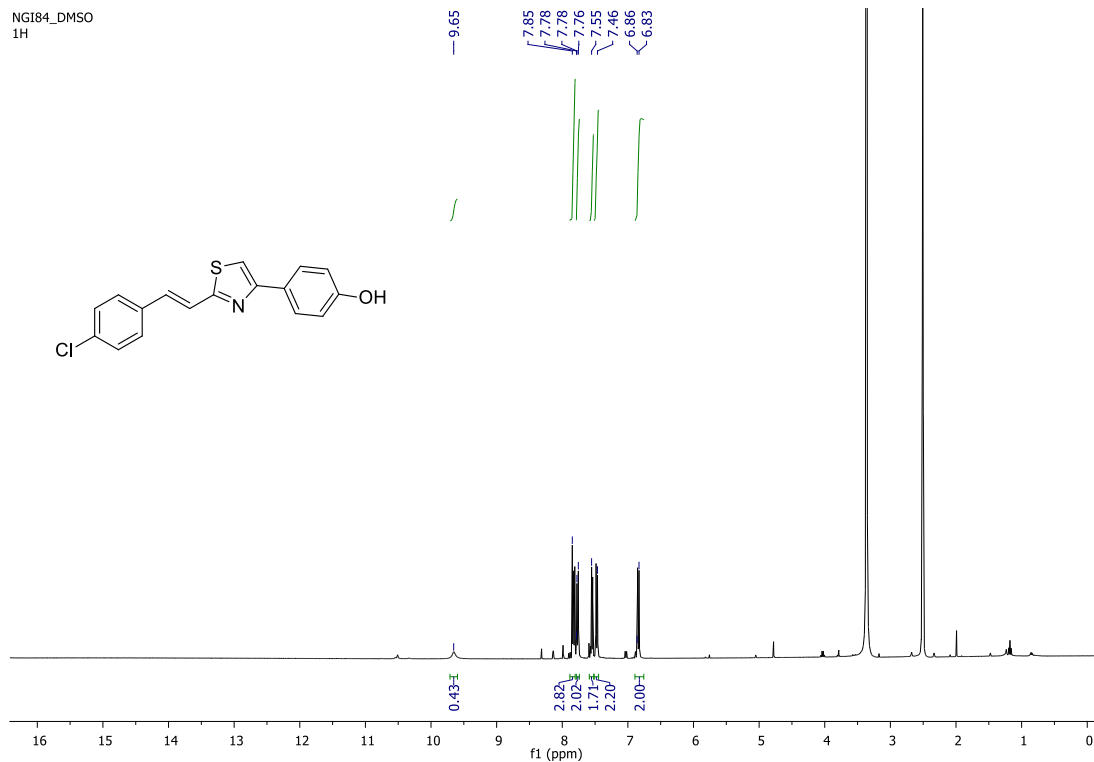

Figure 40:  $^1H$  NMR of 6n in DMSO.

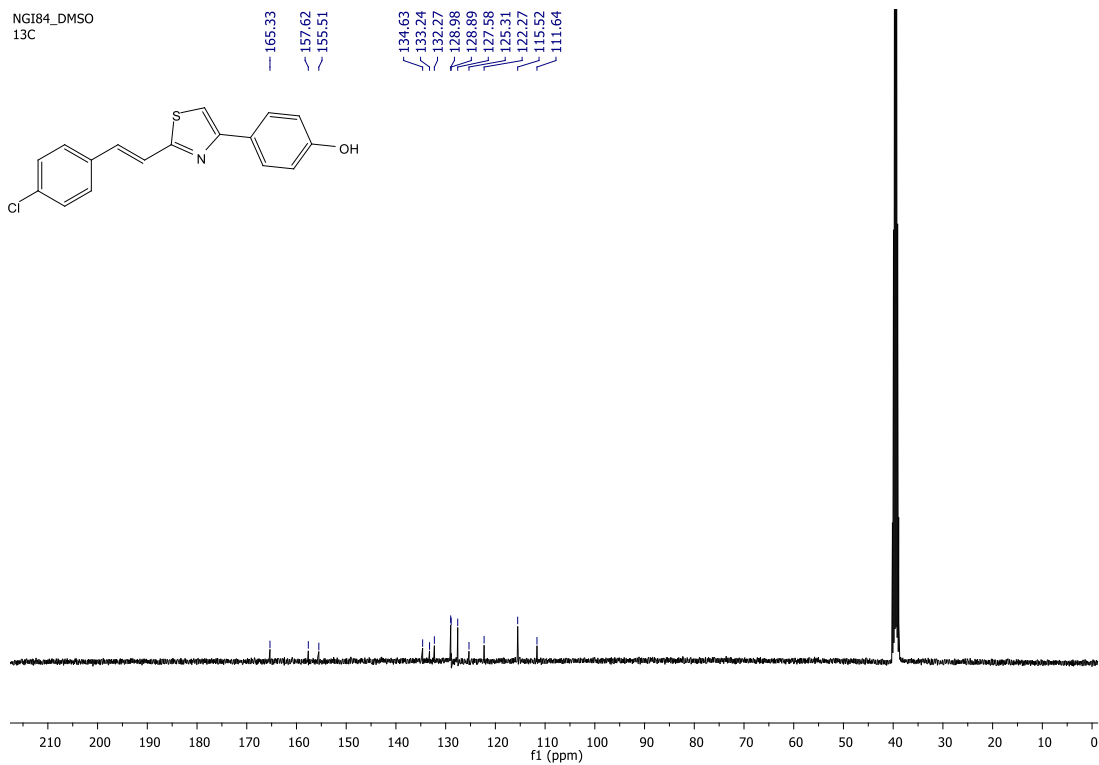

Figure 41:  $^{13}\text{C}$  NMR of **6n** in DMSO.

NGI84\_kl8-10\_ESI+75 #1-55 RT: 0.00-0.48 AV: 55 NL: 1.75E5  
T: {0,0} +p ESI!corona sid=75.00 det=1306.00 Full r

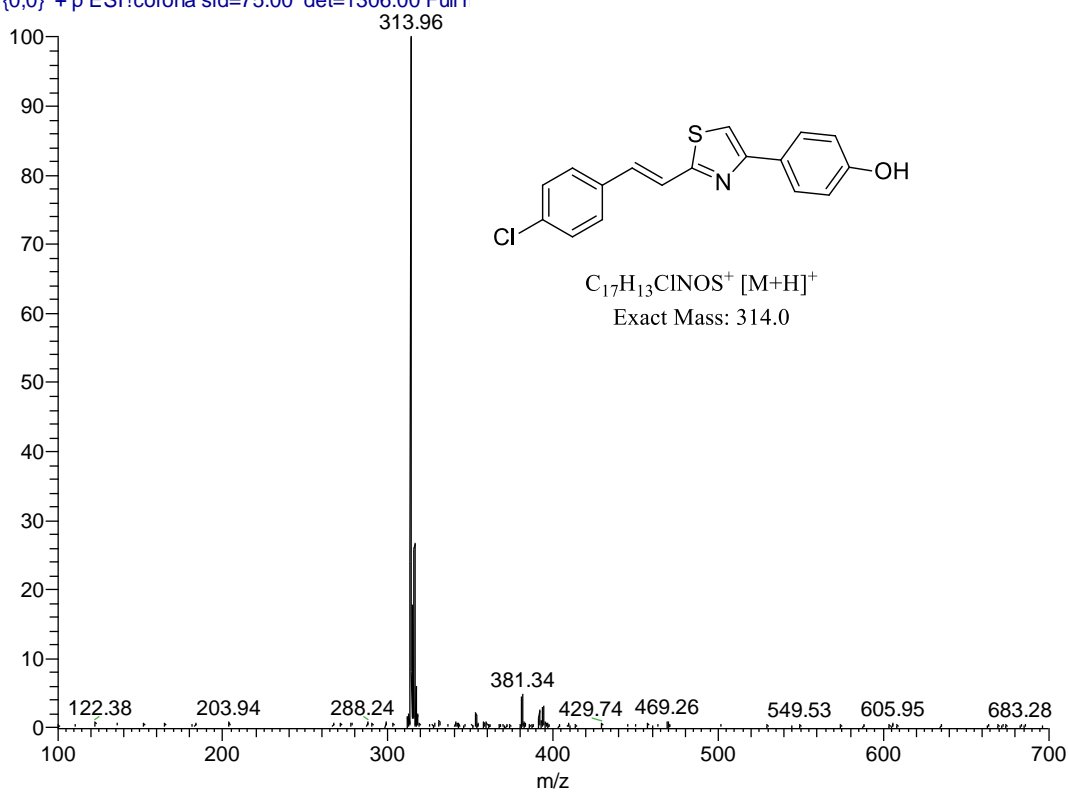

Figure 42: ESI-MS of **6n**.

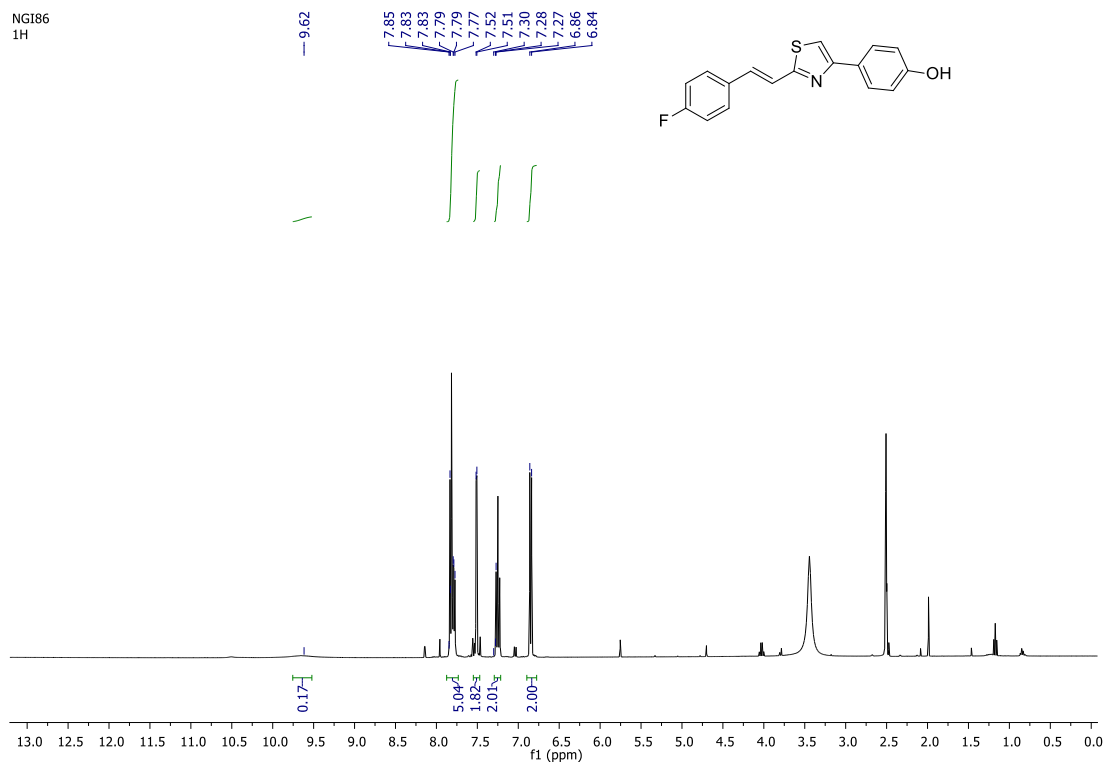

**Figure 43:**  $^1\text{H}$  NMR of **60** in DMSO.

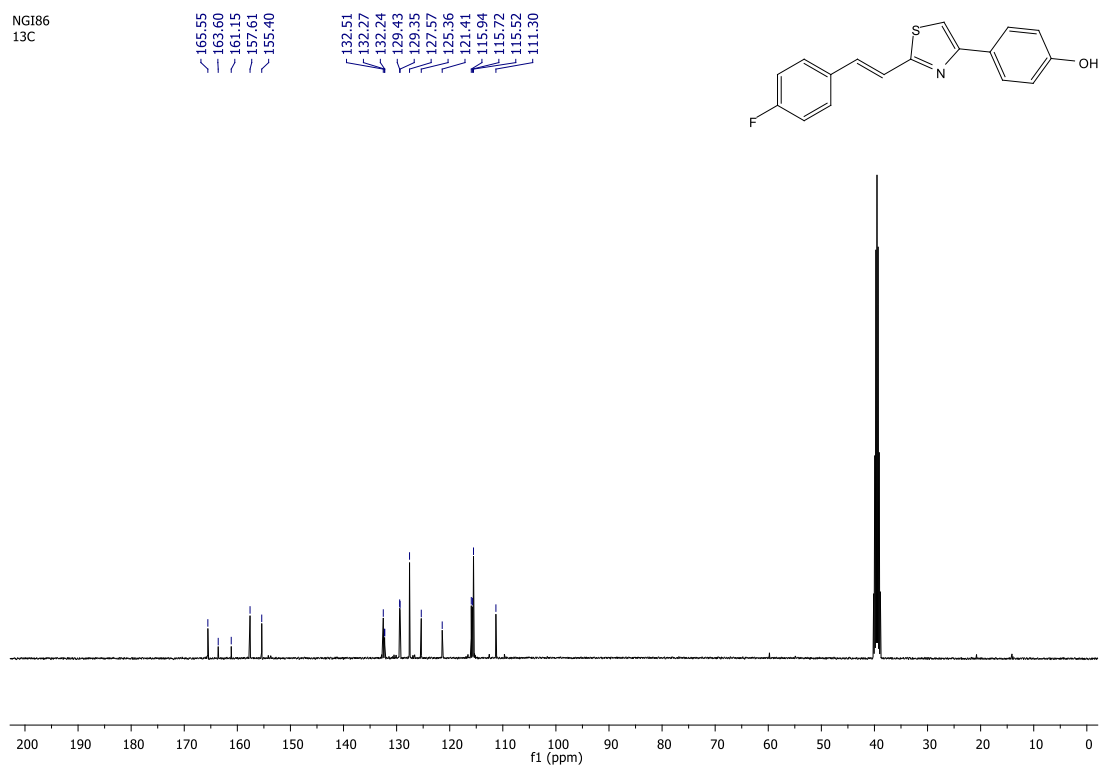

**Figure 44:**  $^{13}\text{C}$  NMR of **60** in DMSO.

NGI86\_ESI+50 #1-9 RT: 0.00-0.07 AV: 9 NL: 7.41E4  
T: {0,0} + p ESI!corona sid=50.00 det=1306.00 Full r

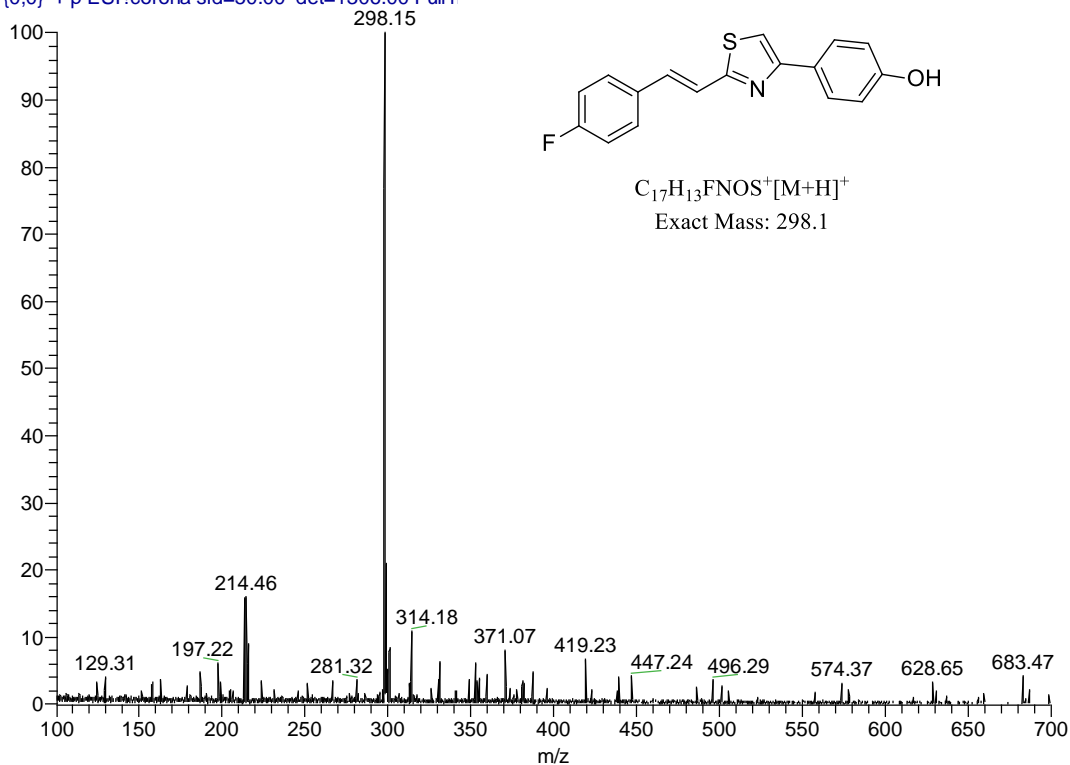

Figure 45: ESI-MS of **6o**.

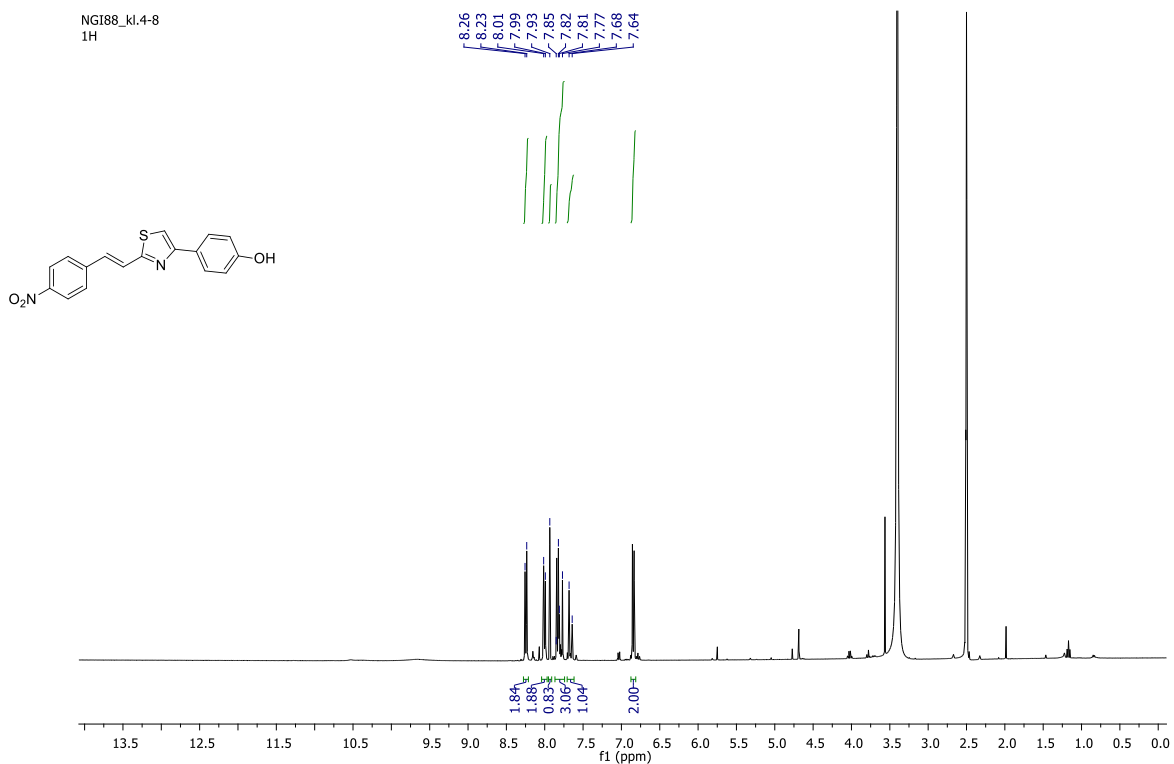

Figure 46:  $^1H$  NMR of **6p** in DMSO.

NGI88\_kl.4-8  
13C

164.63  
157.73  
155.90  
146.94  
142.47  
131.08  
128.22  
127.64  
125.64  
125.16  
124.05  
115.55  
112.80

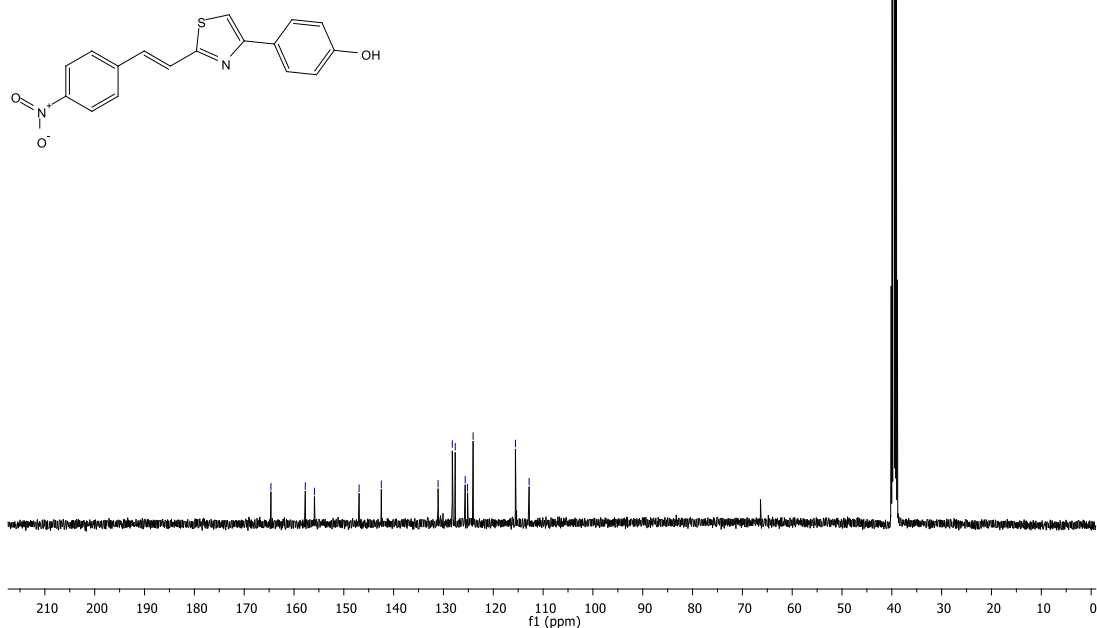

Figure 47:  $^{13}\text{C}$  NMR of **6p** in DMSO.

NGI88\_fr4-8\_ESI+50\_200706132107 #10 RT: 0.30 AV: 1 NL: 3.81E4  
T: {0,0} + p ESI!corona sid=50.00 det=1306.00 Full r

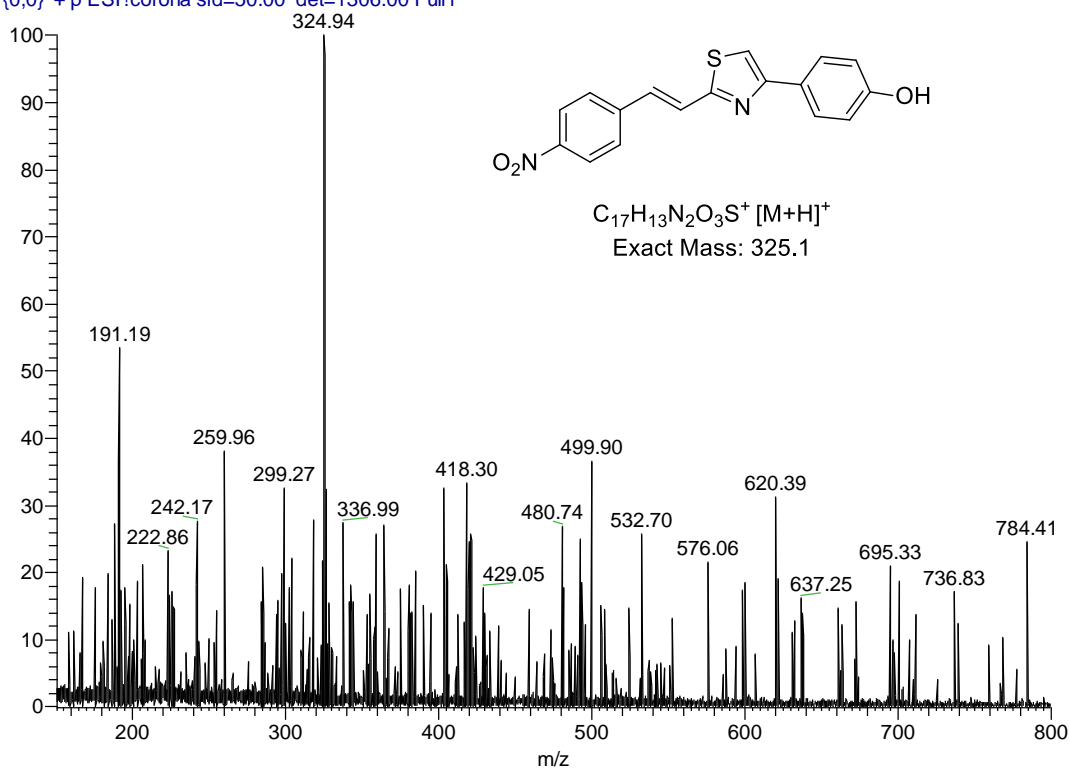

Figure 48: ESI-MS of **6p**.



## HPLC CHROMATOGRAMS OF 6a-6p

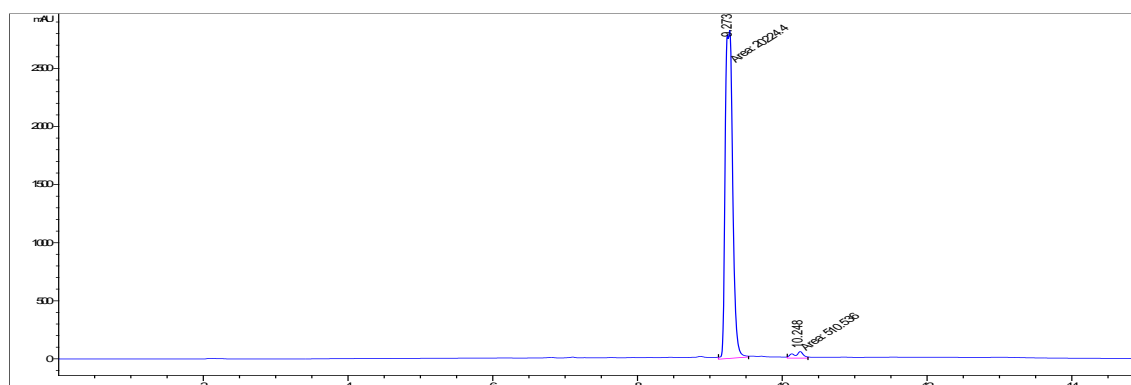

| Compound | Retention time | Area% |
|----------|----------------|-------|
| 6a       | 9.27           | >97   |

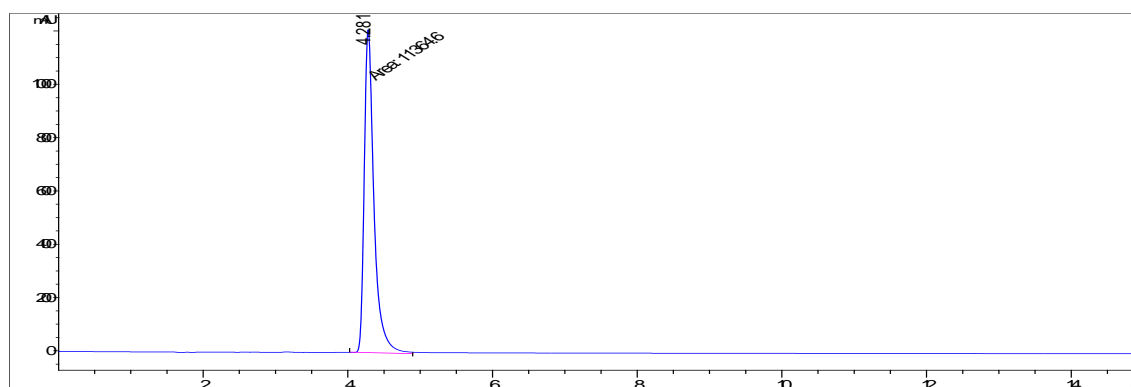

| Compound | Retention time | Area% |
|----------|----------------|-------|
| 6b       | 4.28           | >99   |

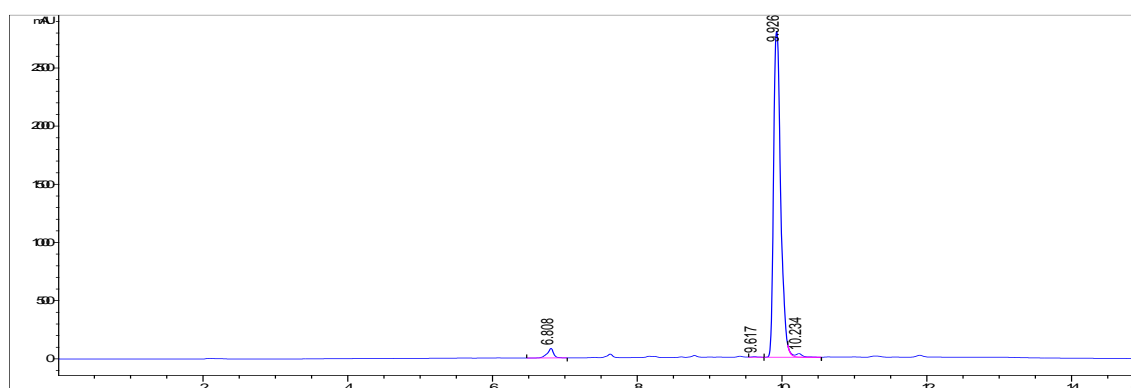

| Compound | Retention time | Area% |
|----------|----------------|-------|
| 6c       | 9.93           | >96   |

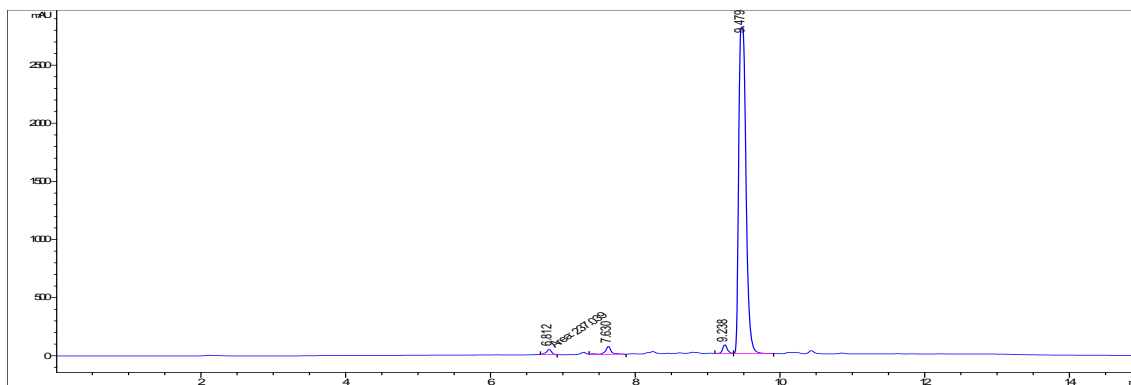

| Compound | Retention time | Area% |
|----------|----------------|-------|
| 6d       | 9.48           | >95   |

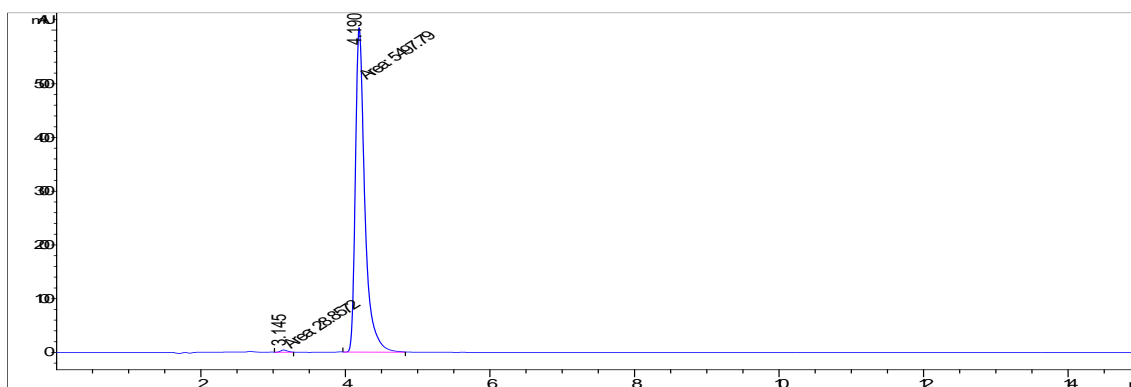

| Compound | Retention time | Area% |
|----------|----------------|-------|
| 6e       | 4.19           | >99   |

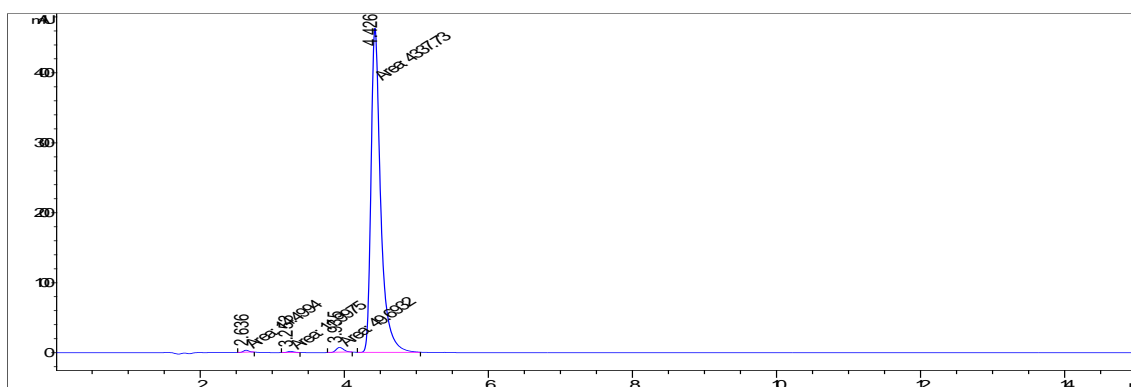

| Compound | Retention time | Area% |
|----------|----------------|-------|
| 6f       | 4.43           | >98   |

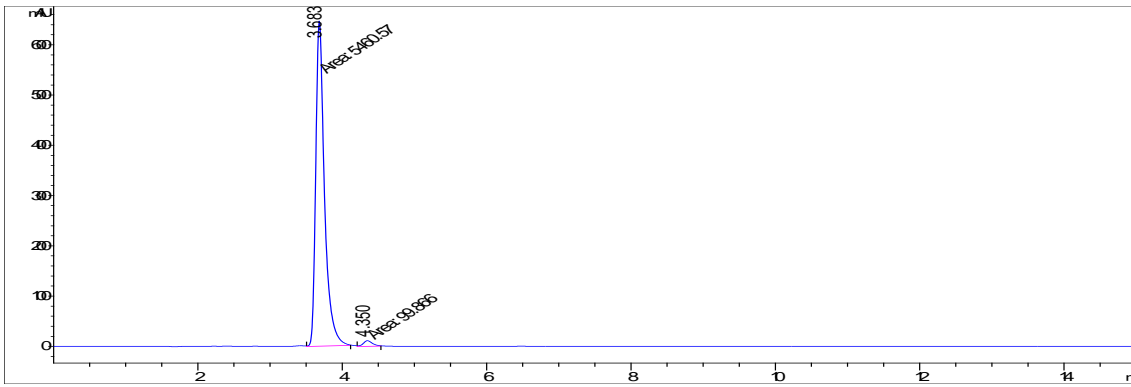

| Compound | Retention time | Area% |
|----------|----------------|-------|
| 6g       | 3.70           | >98   |

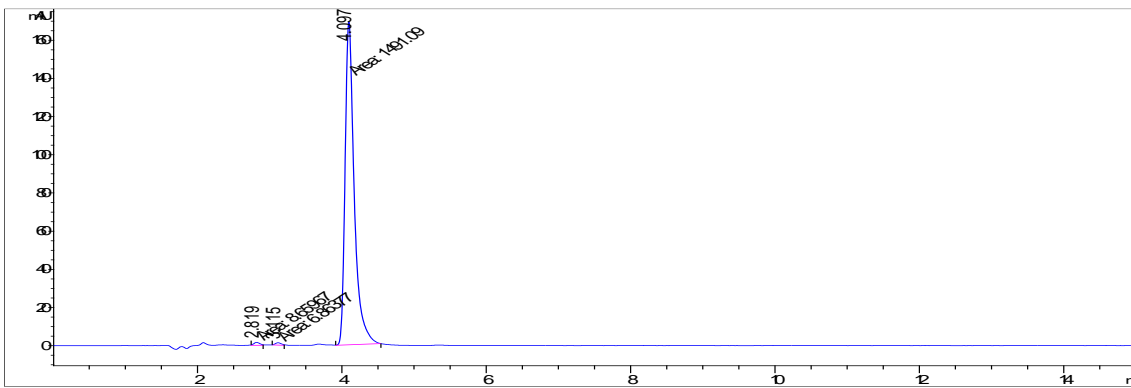

| Compound | Retention time | Area% |
|----------|----------------|-------|
| 6h       | 4.10           | >98   |

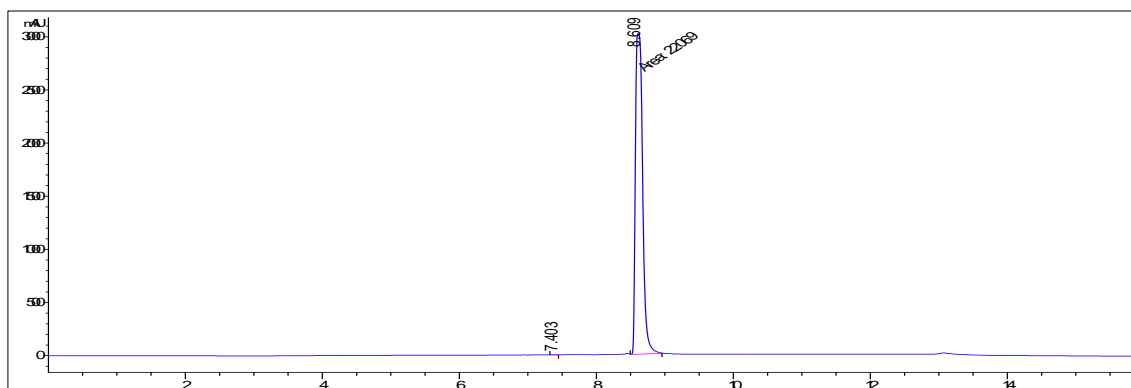

| Compound | Retention time | Area% |
|----------|----------------|-------|
| 6i       | 8.61           | >99   |

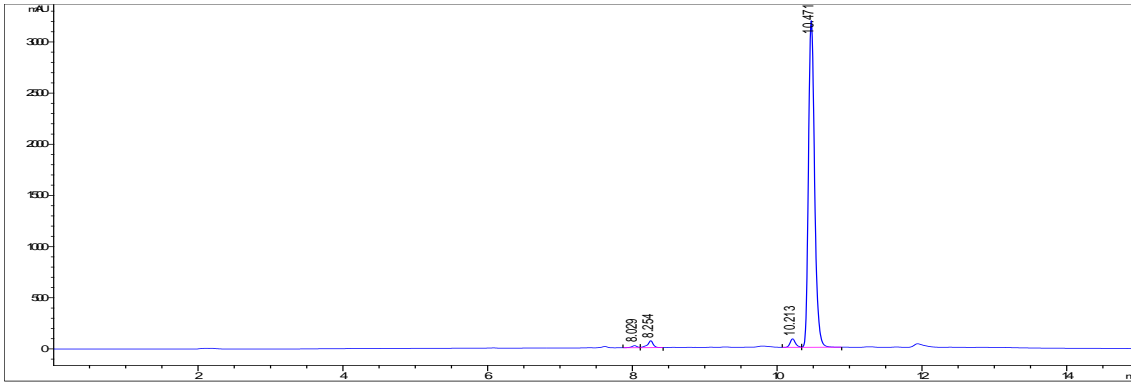

| Compound | Retention time | Area% |
|----------|----------------|-------|
| 6j       | 10.47          | >95   |

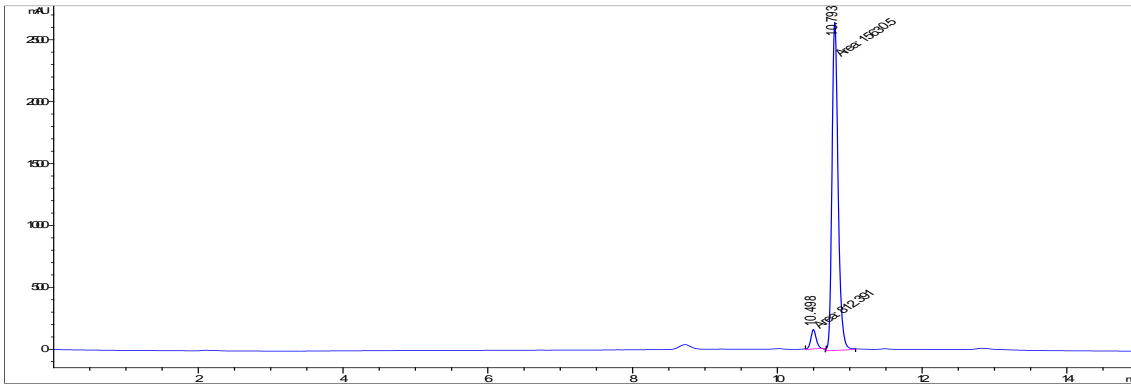

| Compound | Retention time | Area% |
|----------|----------------|-------|
| 6k       | 10.79          | >95   |

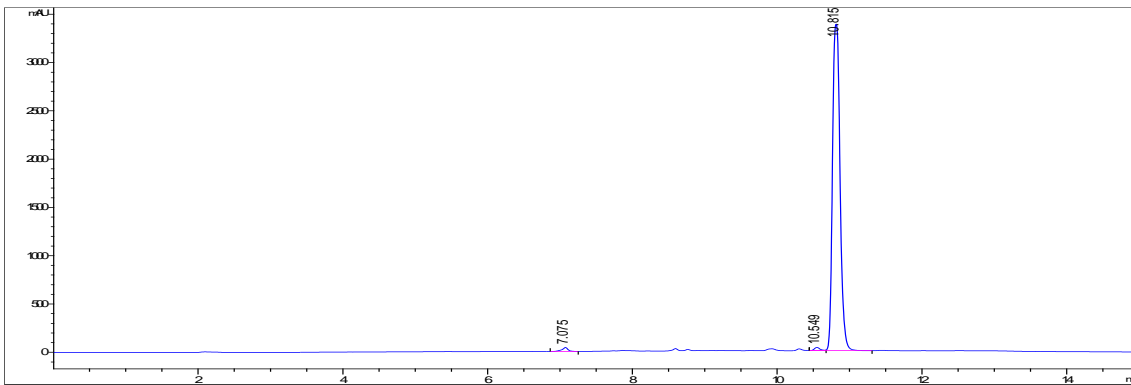

| Compound | Retention time | Area% |
|----------|----------------|-------|
| 6l       | 10.82          | >98   |

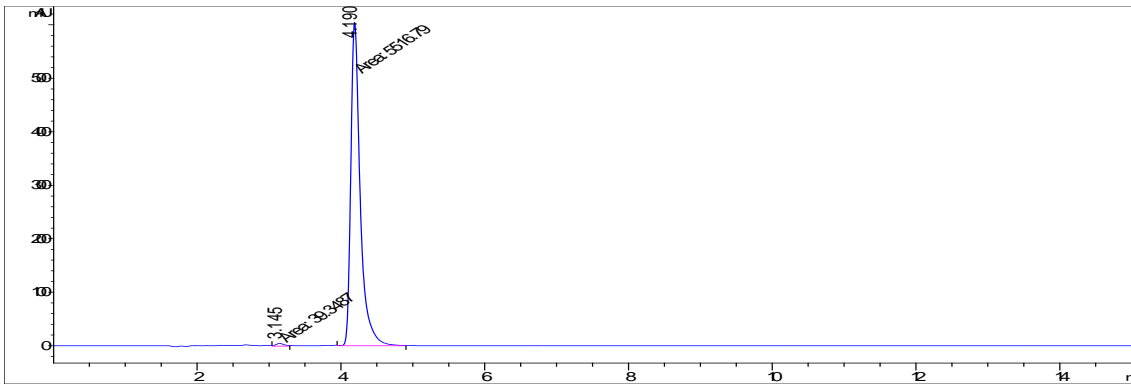

| Compound | Retention time | Area% |
|----------|----------------|-------|
| 6m       | 4.19           | >99   |

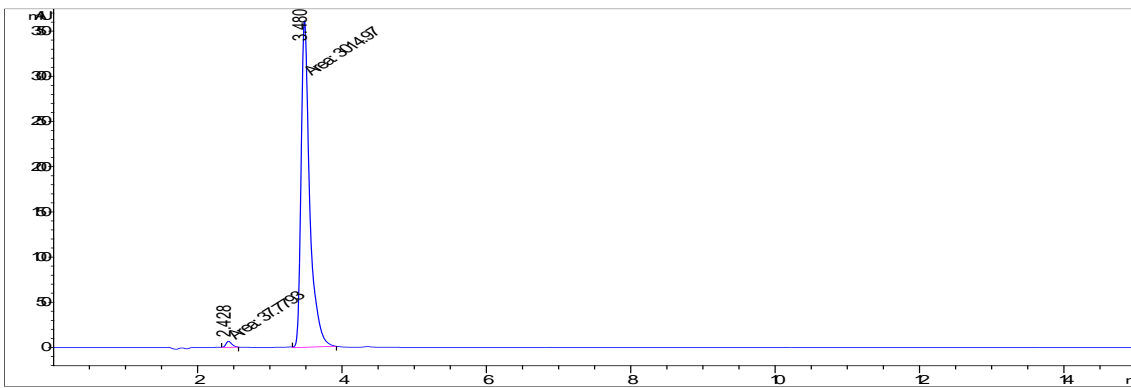

| Compound | Retention time | Area% |
|----------|----------------|-------|
| 6n       | 3.48           | >98   |

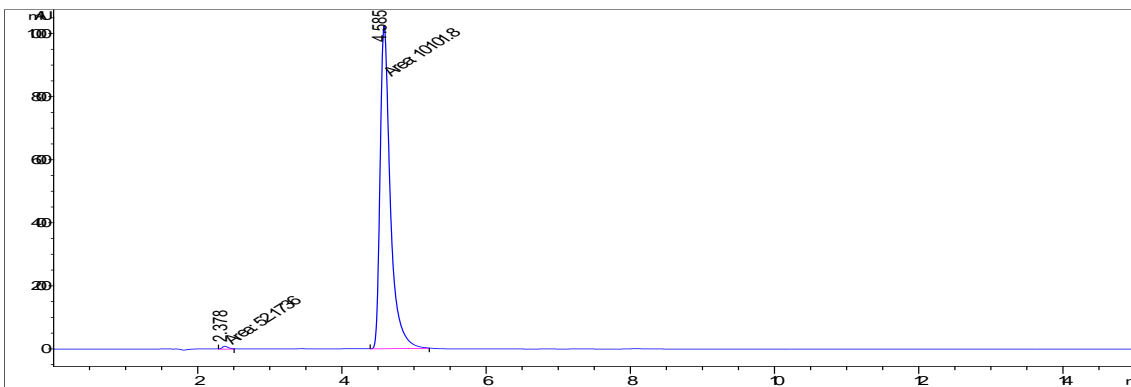

| Compound | Retention time | Area% |
|----------|----------------|-------|
| 6o       | 4.59           | >99   |

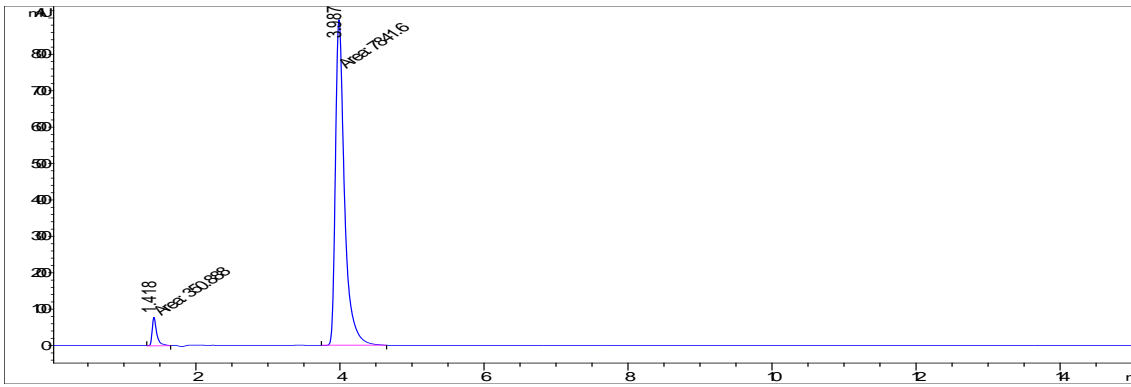

| Compound | Retention time | Area% |
|----------|----------------|-------|
| 6p       | 3.99           | >95   |
